# Supplementary material for: The Rice Malectin Regulates Plant Cell Death and Disease Resistance by Participating in Glycoprotein Quality Control
Source: Int J Mol Sci. 2022 May 22;23(10):5819. doi: 10.3390/ijms23105819 (PMC9144812; doi:10.3390/ijms23105819)
Supplement: Supplementary file 1 [file ijms-23-05819-s001.zip]

Archive with 8 entries (8 files):
- ijms-1724661-Supplementary.pdf
- Table S1 Genetic analysis of mld1.pdf
- Table S2 Identified N-glycosites and N-glycoprotein groups.xlsx
- Table S3 Identified peptides length.pdf
- Table S4 Motif analysis of identified peptides.pdf
- Table S5 COG enrichment of identified N-glycoproteins.xlsx
- Table S6 subcellular location of N-glycoproteins.pdf
- Table S7 primers used in this study.pdf
