# Supplementary material for: The Rice Malectin Regulates Plant Cell Death and Disease Resistance by Participating in Glycoprotein Quality Control
Source: Int J Mol Sci. 2022 May 22;23(10):5819. doi: 10.3390/ijms23105819 (PMC9144812; doi:10.3390/ijms23105819)
Supplement: Supplementary file 1 [file ijms-23-05819-s001.zip › Table S1 Genetic analysis of mld1.pdf]

**Table S1 Genetic analysis of *mld1***

| class               | T1 plants | T2 HygB<br>resistance<br>homozygous<br>plants | T2 HygB<br>resistance<br>separation<br>plants | T2 HygB<br>susceptible<br>plants |
|---------------------|-----------|-----------------------------------------------|-----------------------------------------------|----------------------------------|
| Mutant<br>phenotype | 4         | 4                                             | 0                                             | 0                                |
| WT phenotype        | 18        | 0                                             | 12                                            | 6                                |
| total               | 22        | 4                                             | 12                                            | 6                                |
