# Supplementary material for: The Rice Malectin Regulates Plant Cell Death and Disease Resistance by Participating in Glycoprotein Quality Control
Source: Int J Mol Sci. 2022 May 22;23(10):5819. doi: 10.3390/ijms23105819 (PMC9144812; doi:10.3390/ijms23105819)
Supplement: Supplementary file 1 [file ijms-23-05819-s001.zip › Table S2 Identified N-glycosites and N-glycoprotein groups.xlsx]

## Sheet: 18O (N)Sites
18O(N) sites of WT and mld1
N-glycoprotein groups	Proteins	Positions within proteins	Sequence window	Modification window	Peptide window coverage	Charge	Score	Peptides Deamidation 18O (N) Score diffs	Peptides Deamidation 18O (N) Probabilities	Position in peptide	Intensity mld1	Intensity WT	N-glycoprotein groups	Description
A0A0P0W470	A0A0P0W470	2	______________MNRNNIHDPNFFRCQCS	X;X;X;X;X;X;X;X;X;X;X;X;X;X;X;Deamidation 18O (N);X;Deamidation 18O (N);Deamidation 18O (N);X;X;X;X;Deamidation 18O (N);X;X;X;X;X;X;X	XXXXXXXXXXXXXXXPPPPPPPPPPPPPPPP	3	16.306	N(16.31)RN(16.31)N(16.31)IHDPN(16.31)FFRCQCSSK	N(1)RN(1)N(1)IHDPN(1)FFRCQCSSK	1	0	3922700	Os03g0775250	Uncharacterized protein
A0A0P0W470	A0A0P0W470	4	____________MNRNNIHDPNFFRCQCSSK	X;X;X;X;X;X;X;X;X;X;X;X;X;Deamidation 18O (N);X;Deamidation 18O (N);Deamidation 18O (N);X;X;X;X;Deamidation 18O (N);X;X;X;X;X;X;X;X;X	XXXXXXXXXXXXXPPPPPPPPPPPPPPPPPP	3	16.306	N(16.31)RN(16.31)N(16.31)IHDPN(16.31)FFRCQCSSK	N(1)RN(1)N(1)IHDPN(1)FFRCQCSSK	3	0	3922700	Os03g0775250	Uncharacterized protein
A0A0P0W470	A0A0P0W470	5	___________MNRNNIHDPNFFRCQCSSKS	X;X;X;X;X;X;X;X;X;X;X;X;Deamidation 18O (N);X;Deamidation 18O (N);Deamidation 18O (N);X;X;X;X;Deamidation 18O (N);X;X;X;X;X;X;X;X;X;X	XXXXXXXXXXXXPPPPPPPPPPPPPPPPPPX	3	16.306	N(16.31)RN(16.31)N(16.31)IHDPN(16.31)FFRCQCSSK	N(1)RN(1)N(1)IHDPN(1)FFRCQCSSK	4	0	3922700	Os03g0775250	Uncharacterized protein
A0A0P0W470	A0A0P0W470	10	______MNRNNIHDPNFFRCQCSSKSARKHC	X;X;X;X;X;X;X;Deamidation 18O (N);X;Deamidation 18O (N);Deamidation 18O (N);X;X;X;X;Deamidation 18O (N);X;X;X;X;X;X;X;X;X;X;X;X;X;X;X	XXXXXXXPPPPPPPPPPPPPPPPPPXXXXXX	3	16.306	N(16.31)RN(16.31)N(16.31)IHDPN(16.31)FFRCQCSSK	N(1)RN(1)N(1)IHDPN(1)FFRCQCSSK	9	0	3922700	Os03g0775250	Uncharacterized protein
Q2QW68	Q2QW68;A2ZIY1;A0A0E0J7W1	190;190;190	EMDMIVQWLIKPLDGNAETQVSSTSPMHVPV	X;X;X;X;X;X;X;X;X;X;X;X;X;X;X;Deamidation 18O (N);X;X;X;X;X;X;X;X;X;X;Oxidation (M);X;X;X;X	XXXXXXXXXXXPPPPPPPPPPPPPPPPPPPP	2	29.274	PLDGN(29.27)AETQVSSTSPMHVPVISIVGPGGMGK	PLDGN(1)AETQVSSTSPMHVPVISIVGPGGMGK	5	0	32146000	LOC_Os12g10390	disease resistance protein, putative, expressed
A2ZFH5	A2ZFH5	633	QIPRFLGNISMLSYLNLSFNNFSGEVPDFGV	X;X;X;X;X;X;X;X;X;X;Oxidation (M);X;X;X;X;Deamidation 18O (N);X;X;X;X;X;X;X;X;X;X;X;X;X;X;X	XXXXPPPPPPPPPPPPPPPPPPPPPPPPPPP	4	11.481	FLGN(-4.45)ISMLSYLN(4.45)LSFN(-4.56)N(-4.56)FSGEVPDFGVFTN(-4.56)ITAFLIQGN(4.56)DK	FLGN(0.222)ISMLSYLN(0.513)LSFN(0.242)N(0.242)FSGEVPDFGVFTN(0.242)ITAFLIQGN(0.539)DK	12	0	18801000	LOC_Os11g36140	receptor-like protein kinase 2 precursor, putative, expressed
A2ZFH5	A2ZFH5	660	DFGVFTNITAFLIQGNDKLCGGIPTLHLRPC	X;X;X;X;X;X;X;X;X;X;X;X;X;X;X;Deamidation 18O (N);X;X;X;X;X;X;X;X;X;X;X;X;X;X;X	PPPPPPPPPPPPPPPPPPXXXXXXXXXXXXX	4	11.481	FLGN(-4.45)ISMLSYLN(4.45)LSFN(-4.56)N(-4.56)FSGEVPDFGVFTN(-4.56)ITAFLIQGN(4.56)DK	FLGN(0.222)ISMLSYLN(0.513)LSFN(0.242)N(0.242)FSGEVPDFGVFTN(0.242)ITAFLIQGN(0.539)DK	39	0	18801000	LOC_Os11g36140	receptor-like protein kinase 2 precursor, putative, expressed
A0A0P0Y3Q8	A0A0P0Y3Q8;B9GB77;A0A0E0J3D0;Q2R2K0	214;214;214;214	VTRLRRLRYLNMGDVNLSMADYRTSASRFAR	X;X;X;X;X;X;X;X;X;X;X;Oxidation (M);X;X;X;Deamidation 18O (N);X;X;Oxidation (M);X;X;X;X;X;X;X;X;X;X;X;X	XXXXXXXXPPPPPPPPPPPPPPPXXXXXXXX	2	26.118	YLN(-26.12)MGDVN(26.12)LSMADYR	YLN(0.002)MGDVN(0.998)LSMADYR	8	0	16875000	LOC_Os11g35550	Leucine Rich Repeat family protein, expressed
Q259Y8	Q259Y8;Q7X6F6;Q01HY2;B8AV76;A0A0E0H6D8;B9FCS8;Q5JQX8	127;127;127;127;127;93;127	GATSFPQPILTAASFNASLFRAIGEERMCVN	X;X;X;X;X;X;X;X;X;X;X;X;X;X;X;Deamidation 18O (N);X;X;X;X;X;X;X;X;X;X;X;X;X;X;X	PPPPPPPPPPPPPPPPPPPPPXXXXXXXXXX	3	83.202	FSTLVPGATSFPQPILTAASFN(83.2)ASLFR	FSTLVPGATSFPQPILTAASFN(1)ASLFR	22	0	49332000	LOC_Os04g54810	beta-D-xylosidase, putative, expressed
A0A0E0GQA7	A0A0E0GQA7	5	___________MMMINTQCNRPSACATAPTE	X;X;X;X;X;X;X;X;X;X;X;Oxidation (M);X;X;X;Deamidation 18O (N);X;X;X;Deamidation 18O (N);X;X;X;X;X;X;X;X;X;X;X	XXXXXXXXXXXPPPPPPPPPPXXXXXXXXXX	2	30.167	MMMIN(30.17)TQCN(30.17)R	MMMIN(1)TQCN(1)R	5	0	2634100	LOC_Os03g40330	glycosyl hydrolases family 17, putative, expressed
A0A0E0GQA7	A0A0E0GQA7	9	_______MMMINTQCNRPSACATAPTETTCR	X;X;X;X;X;X;X;Oxidation (M);X;X;X;Deamidation 18O (N);X;X;X;Deamidation 18O (N);X;X;X;X;X;X;X;X;X;X;X;X;X;X;X	XXXXXXXPPPPPPPPPPXXXXXXXXXXXXXX	2	30.167	MMMIN(30.17)TQCN(30.17)R	MMMIN(1)TQCN(1)R	9	0	2634100	LOC_Os03g40330	glycosyl hydrolases family 17, putative, expressed
A2WZV9	A2WZV9;A0A0E0FZY6;B9F1R2	462;462;523	DLDSLSFHQGGLLMANKKCELPPGSFRTPHK	X;X;X;X;X;X;X;X;X;X;X;X;X;Oxidation (M);X;Deamidation 18O (N);X;X;X;X;X;X;X;X;X;X;X;X;X;X;X	PPPPPPPPPPPPPPPPPPXXXXXXXXXXXXX	2	50.222	QLLDLDSLSFHQGGLLMAN(50.22)KK	QLLDLDSLSFHQGGLLMAN(1)KK	19	0	136100000	LOC_Os02g01740	U5 small nuclear ribonucleoprotein 200 kDa helicase, putative, expressed
Q0IM71	Q0IM71;A2ZMA2;A3CJ12;Q2QMS5;A0A0E0JBW1	315;443;468;525;525	FSVEECEDLRLIIQSNIYNYLGILLEGRERF	X;X;X;X;X;X;X;X;X;X;X;X;X;X;X;Deamidation 18O (N);X;X;Deamidation 18O (N);X;X;X;X;X;X;X;X;X;X;X;X	XXXXXXXXXXPPPPPPPPPPPPPPPPPPPPP	4	29.54	LIIQSN(23.05)IYN(23.05)YLGILLEGRERFEEEAIADR	LIIQSN(1)IYN(1)YLGILLEGRERFEEEAIADR	6	0	71095000	LOC_Os12g40190	G-protein alpha subunit, putative, expressed
Q0IM71	Q0IM71;A2ZMA2;A3CJ12;Q2QMS5;A0A0E0JBW1	318;446;471;528;528	EECEDLRLIIQSNIYNYLGILLEGRERFEEE	X;X;X;X;X;X;X;X;X;X;X;X;Deamidation 18O (N);X;X;Deamidation 18O (N);X;X;X;X;X;X;X;X;X;X;X;X;X;X;X	XXXXXXXPPPPPPPPPPPPPPPPPPPPPPPP	4	29.54	LIIQSN(23.05)IYN(23.05)YLGILLEGRERFEEEAIADR	LIIQSN(1)IYN(1)YLGILLEGRERFEEEAIADR	9	0	71095000	LOC_Os12g40190	G-protein alpha subunit, putative, expressed
Q69TK2	Q69TK2;A0A0P0WTF1;A0A0P0WTE6;B9FRY0	265;294;403;509	LQIGVPVRRDFKTFVNVETNPNTNRSTVSGY	X;X;X;X;X;X;X;X;X;X;X;X;X;X;X;Deamidation 18O (N);X;X;X;Deamidation 18O (N);X;Deamidation 18O (N);X;Deamidation 18O (N);X;X;X;X;X;X;X	XXXXXXXXXPPPPPPPPPPPPPPPPXXXXXX	2	22.917	DFKTFVN(22.92)VETN(22.92)PN(22.92)TN(22.92)R	DFKTFVN(1)VETN(1)PN(1)TN(1)R	7	0	35152000	LOC_Os06g09130	glutamate receptor 2.8 precursor, putative, expressed
Q69TK2	Q69TK2;A0A0P0WTF1;A0A0P0WTE6;B9FRY0	269;298;407;513	VPVRRDFKTFVNVETNPNTNRSTVSGYSIDM	X;X;X;X;X;X;X;X;X;X;X;Deamidation 18O (N);X;X;X;Deamidation 18O (N);X;Deamidation 18O (N);X;Deamidation 18O (N);X;X;X;X;X;X;X;X;X;X;X	XXXXXPPPPPPPPPPPPPPPPXXXXXXXXXX	2	22.917	DFKTFVN(22.92)VETN(22.92)PN(22.92)TN(22.92)R	DFKTFVN(1)VETN(1)PN(1)TN(1)R	11	0	35152000	LOC_Os06g09130	glutamate receptor 2.8 precursor, putative, expressed
Q69TK2	Q69TK2;A0A0P0WTF1;A0A0P0WTE6;B9FRY0	271;300;409;515	VRRDFKTFVNVETNPNTNRSTVSGYSIDMFE	X;X;X;X;X;X;X;X;X;Deamidation 18O (N);X;X;X;Deamidation 18O (N);X;Deamidation 18O (N);X;Deamidation 18O (N);X;X;X;X;X;X;X;X;X;X;X;X;X	XXXPPPPPPPPPPPPPPPPXXXXXXXXXXXX	2	22.917	DFKTFVN(22.92)VETN(22.92)PN(22.92)TN(22.92)R	DFKTFVN(1)VETN(1)PN(1)TN(1)R	13	0	35152000	LOC_Os06g09130	glutamate receptor 2.8 precursor, putative, expressed
Q69TK2	Q69TK2;A0A0P0WTF1;A0A0P0WTE6;B9FRY0	273;302;411;517	RDFKTFVNVETNPNTNRSTVSGYSIDMFEAA	X;X;X;X;X;X;X;Deamidation 18O (N);X;X;X;Deamidation 18O (N);X;Deamidation 18O (N);X;Deamidation 18O (N);X;X;X;X;X;X;X;X;X;X;X;X;X;X;X	XPPPPPPPPPPPPPPPPXXXXXXXXXXXXXX	2	22.917	DFKTFVN(22.92)VETN(22.92)PN(22.92)TN(22.92)R	DFKTFVN(1)VETN(1)PN(1)TN(1)R	15	0	35152000	LOC_Os06g09130	glutamate receptor 2.8 precursor, putative, expressed
A3BKU8	A3BKU8;Q0D5P8;P83646;A0A0E0I201	125;129;129;129	AEAAARAKESAQDIINLKPLIEKKQWPFVRD	X;X;X;X;X;X;X;X;X;X;X;X;X;X;X;Deamidation 18O (N);X;X;X;X;X;X;X;X;X;X;X;X;X;X;X	XXXXXXXXPPPPPPPPPPPPPPPXXXXXXXX	2	64.121	ESAQDIIN(64.12)LKPLIEK	ESAQDIIN(1)LKPLIEK	8	0	29971000	LOC_Os07g36080	oxygen evolving enhancer protein 3 domain containing protein, expressed
A0A0P0WGE6	A0A0P0WGE6;Q7XKD4;B9FDB9	220;218;218	NRGNIPTIFLHSVLPNLLENPEFQNRRNPGR	X;X;X;X;X;X;X;X;X;X;X;X;X;X;X;Deamidation 18O (N);X;X;X;X;X;X;X;X;X;X;X;X;X;X;X	XXPPPPPPPPPPPPPPPPPPPPPPPPPXXXX	3	18.56	GN(-12.06)IPTIFLHSVLPN(6.48)LLEN(-6.48)PEFQN(-6.48)RR	GN(0.041)IPTIFLHSVLPN(0.661)LLEN(0.149)PEFQN(0.149)RR	14	0	22684000	LOC_Os04g58400	tRNA synthetase, putative, expressed
Q6ENG6	Q6ENG6;P0C512;P0C511;P0C510;J7F213;A0A0N9E107;A0A0N7EIT9;A0A0K0LRL1;A0A0K0LQW8;A0A0K0LL33;E9KIP7;Q5K3B1;Q32753;A0A1C3HPR7;A0A1W5HWL6;A0A0P0Y838;A0A088BVM4;A0A088BVM0;A0A1C3HPR9;A0A1C3HPR8;H5ZXH7;Q0IPF7;Q37247;D3W4H3;Q2QW49;A0A2I7QEM0;A0A141KRA2;R4I712;A0A0P0VBL9;Q339G9;Q8S6F2	205;205;205;205;205;205;205;205;205;205;212;205;205;205;205;205;185;185;205;205;205;205;205;198;205;191;154;200;34;90;205	YECLRGGLDFTKDDENVNSQPFMRWRDRFVF	X;X;X;X;X;X;X;X;X;X;X;X;X;X;X;Deamidation 18O (N);X;Deamidation 18O (N);X;X;X;X;Oxidation (M);X;X;X;X;X;X;X;X	XXXXXPPPPPPPPPPPPPPPPPPPXXXXXXX	3	66.606	GGLDFTKDDEN(66.61)VN(66.61)SQPFMR	GGLDFTKDDEN(1)VN(1)SQPFMR	11	0	16339000	LOC_Os10g21268	ribulose bisphosphate carboxylase large chain precursor, putative, expressed
Q6ENG6	Q6ENG6;P0C512;P0C511;P0C510;J7F213;A0A0N9E107;A0A0N7EIT9;A0A0K0LRL1;A0A0K0LQW8;A0A0K0LL33;E9KIP7;Q5K3B1;Q32753;A0A1C3HPR7;A0A1W5HWL6;A0A0P0Y838;A0A088BVM4;A0A088BVM0;A0A1C3HPR9;A0A1C3HPR8;H5ZXH7;Q0IPF7;Q37247;D3W4H3;Q2QW49;A0A2I7QEM0;A0A141KRA2;R4I712;A0A0P0VBL9;Q339G9;Q8S6F2	207;207;207;207;207;207;207;207;207;207;214;207;207;207;207;207;187;187;207;207;207;207;207;200;207;193;156;202;36;92;207	CLRGGLDFTKDDENVNSQPFMRWRDRFVFCA	X;X;X;X;X;X;X;X;X;X;X;X;X;Deamidation 18O (N);X;Deamidation 18O (N);X;X;X;X;Oxidation (M);X;X;X;X;X;X;X;X;X;X	XXXPPPPPPPPPPPPPPPPPPPXXXXXXXXX	3	66.606	GGLDFTKDDEN(66.61)VN(66.61)SQPFMR	GGLDFTKDDEN(1)VN(1)SQPFMR	13	0	16339000	LOC_Os10g21268	ribulose bisphosphate carboxylase large chain precursor, putative, expressed
Q10M77	Q10M77;B8ANG8;B9F864;A0A0E0GLN7	381;381;381;566	DAPNNFTYSTKLDNGNHMVSANKMCVCKCTS	X;X;X;X;X;X;X;X;X;X;X;X;X;X;X;Deamidation 18O (N);X;X;X;X;X;Deamidation 18O (N);X;X;X;X;X;X;X;X;X	XXXXXXXXXXXPPPPPPPPPPPPXXXXXXXX	2	47.603	LDN(-16.18)GN(16.18)HMVSAN(33.83)K	LDN(0.024)GN(0.976)HMVSAN(1)K	5	0	11942000	LOC_Os03g20430	histone-lysine N-methyltransferase, H3 lysine-9 specific SUVH8, putative, expressed
Q10M77	Q10M77;B8ANG8;B9F864;A0A0E0GLN7	387;387;387;572	TYSTKLDNGNHMVSANKMCVCKCTSSCLGED	X;X;X;X;X;X;X;X;X;Deamidation 18O (N);X;X;X;X;X;Deamidation 18O (N);X;X;X;X;X;X;X;X;X;X;X;X;X;X;X	XXXXXPPPPPPPPPPPPXXXXXXXXXXXXXX	2	47.603	LDN(-16.18)GN(16.18)HMVSAN(33.83)K	LDN(0.024)GN(0.976)HMVSAN(1)K	11	0	11942000	LOC_Os03g20430	histone-lysine N-methyltransferase, H3 lysine-9 specific SUVH8, putative, expressed
A0A0P0WM76	A0A0P0WM76;Q6AU90;A2Y4M9;A0A0E0HEE8	73;565;565;565	RVMYNEAIPLTGKTANNTEPFNRTSESSSKL	X;X;X;X;X;X;X;X;X;X;X;X;X;X;X;Deamidation 18O (N);X;X;X;X;X;Deamidation 18O (N);X;X;X;X;X;X;X;X;X	XXXXXXXXXXXXXPPPPPPPPPPXXXXXXXX	2	103.56	TAN(31.08)N(-31.08)TEPFN(41.56)R	TAN(0.999)N(0.001)TEPFN(1)R	3	0	3479100	LOC_Os05g34050	bZIP transcription factor domain containing protein, expressed
A0A0P0WM76	A0A0P0WM76;Q6AU90;A2Y4M9;A0A0E0HEE8	79;571;571;571	AIPLTGKTANNTEPFNRTSESSSKLPDSKPA	X;X;X;X;X;X;X;X;X;Deamidation 18O (N);X;X;X;X;X;Deamidation 18O (N);X;X;X;X;X;X;X;X;X;X;X;X;X;X;X	XXXXXXXPPPPPPPPPPXXXXXXXXXXXXXX	2	103.56	TAN(31.08)N(-31.08)TEPFN(41.56)R	TAN(0.999)N(0.001)TEPFN(1)R	9	0	3479100	LOC_Os05g34050	bZIP transcription factor domain containing protein, expressed
B8BMX1	B8BMX1	7	_________MLDATFNAKLGDFGLARLVDHG	X;X;X;X;X;X;X;X;X;Oxidation (M);X;X;X;X;X;Deamidation 18O (N);X;X;X;X;X;X;X;X;X;X;X;X;X;X;X	XXXXXXXXXPPPPPPPPPPPPPPPPPXXXXX	2	13.428	MLDATFN(13.43)AKLGDFGLAR	MLDATFN(1)AKLGDFGLAR	7	0	3437600	LOC_Os12g41510	cysteine-rich receptor-like protein kinase 31 precursor, putative, expressed
B8ANG3	B8ANG3	510	VFATQLYSHVRDLWINKL_____________	X;X;X;X;X;X;X;X;X;X;X;X;X;X;X;Deamidation 18O (N);X;X;X;X;X;X;X;X;X;X;X;X;X;X;X	XXXXXXXXXXXPPPPPPPXXXXXXXXXXXXX	1	17.767	DLWIN(17.77)KL	DLWIN(1)KL	5	0	2750300	LOC_Os03g20940	stress responsive protein, putative, expressed
B8APV8	B8APV8	68	HVEAVLAKKCGPHEDNFGLVEPRVGIGCDRC	X;X;X;X;X;X;X;X;X;X;X;X;X;X;X;Deamidation 18O (N);X;X;X;X;X;X;X;X;X;X;X;X;X;X;X	XXXXXXXXPPPPPPPPPPPPPPPXXXXXXXX	2	33.89	KCGPHEDN(33.89)FGLVEPR	KCGPHEDN(1)FGLVEPR	8	0	11715000	EEC75266.1	Uncharacterized protein
A0A0P0W8N8	A0A0P0W8N8	14	__METVSEASMGHGMNYALKRSIEDSGNQIS	X;X;Oxidation (M);X;X;X;X;X;X;X;Oxidation (M);X;X;X;X;Deamidation 18O (N);X;X;X;X;X;X;X;X;X;X;X;X;X;X;X	XXPPPPPPPPPPPPPPPPPPXXXXXXXXXXX	2	29.341	METVSEASMGHGMN(29.34)YALK	METVSEASMGHGMN(1)YALK	14	0	51722000	LOC_Os04g27370	hypothetical protein
B8BFE4	B8BFE4;A0A0E0IK88	1199;1315	NASLQKEEKVNDSSKNAENADNPIEKTVAPK	X;X;X;X;X;X;X;X;X;X;X;X;X;X;X;Deamidation 18O (N);X;X;Deamidation 18O (N);X;X;X;X;X;X;X;X;X;X;X;X	XXXXXXPPPPPPPPPPPPPPPPPPPPXXXXX	2	26.359	EEKVN(-5.63)DSSKN(8.26)AEN(5.63)ADN(-7.53)PIEK	EEKVN(0.226)DSSKN(0.847)AEN(0.727)ADN(0.2)PIEK	10	0	22518000	EEE69780.1	Uncharacterized protein
B8BFE4	B8BFE4;A0A0E0IK88	1202;1318	LQKEEKVNDSSKNAENADNPIEKTVAPKGQE	X;X;X;X;X;X;X;X;X;X;X;X;Deamidation 18O (N);X;X;Deamidation 18O (N);X;X;X;X;X;X;X;X;X;X;X;X;X;X;X	XXXPPPPPPPPPPPPPPPPPPPPXXXXXXXX	2	26.359	EEKVN(-5.63)DSSKN(8.26)AEN(5.63)ADN(-7.53)PIEK	EEKVN(0.226)DSSKN(0.847)AEN(0.727)ADN(0.2)PIEK	13	0	22518000	EEE69780.1	Uncharacterized protein
Q6YUE2	Q6YUE2;Q6YUE0;B8BBY2;B9FZM3;B9FZM4	10;10;10;10;10	______MASMKLVADNGATSTTKIPTTDYSK	X;X;X;X;X;X;Oxidation (M);X;X;Oxidation (M);X;X;X;X;X;Deamidation 18O (N);X;X;X;X;X;X;X;X;X;X;X;X;X;X;X	XXXXXXPPPPPPPPPPPPPPPPPXXXXXXXX	2	38.634	MASMKLVADN(38.63)GATSTTK	MASMKLVADN(1)GATSTTK	10	0	3267900	LOC_Os08g12220	expressed protein
A0A0P0WYI0	A0A0P0WYI0;Q0DB22;A3BDF8;Q69V61;A2YEW2;A0A0E0HTB9	479;479;479;479;479;479	KQLPCVSLSSSMMEENQSVTHGNQQSINVDW	X;X;X;X;X;X;X;X;X;X;X;Oxidation (M);X;X;X;Deamidation 18O (N);X;X;X;X;X;X;Deamidation 18O (N);X;X;X;X;X;X;X;X	PPPPPPPPPPPPPPPPPPPPPPPPPPPPPPP	5	11.976	SPATSLKQLPCVSLSSSMMEEN(8.27)QSVTHGN(4.48)QQSIN(-4.48)VDWN(-4.48)K	SPATSLKQLPCVSLSSSMMEEN(0.793)QSVTHGN(0.601)QQSIN(0.303)VDWN(0.303)K	22	0	8852100	LOC_Os06g40590	expressed protein
A0A0P0WYI0	A0A0P0WYI0;Q0DB22;A3BDF8;Q69V61;A2YEW2;A0A0E0HTB9	486;486;486;486;486;486	LSSSMMEENQSVTHGNQQSINVDWNKVKLDW	X;X;X;X;Oxidation (M);X;X;X;Deamidation 18O (N);X;X;X;X;X;X;Deamidation 18O (N);X;X;X;X;X;X;X;X;X;X;X;X;X;X;X	PPPPPPPPPPPPPPPPPPPPPPPPPPXXXXX	5	11.976	SPATSLKQLPCVSLSSSMMEEN(8.27)QSVTHGN(4.48)QQSIN(-4.48)VDWN(-4.48)K	SPATSLKQLPCVSLSSSMMEEN(0.793)QSVTHGN(0.601)QQSIN(0.303)VDWN(0.303)K	29	0	8852100	LOC_Os06g40590	expressed protein
A0A0E0GQ84	A0A0E0GQ84	6	__________MPQHKNAEPMVSRDGHAALAV	X;X;X;X;X;X;X;X;X;X;X;X;X;X;X;Deamidation 18O (N);X;X;X;X;X;X;X;X;X;X;X;X;X;X;X	XXXXXXXXXXXPPPPPPPPPPPPXXXXXXXX	2	52.255	PQHKN(24.84)AEPMVSR	PQHKN(1)AEPMVSR	5	0	6973600	A0A0E0GQ84	Uncharacterized protein
Q0JKF7	Q0JKF7;B8A7K4;A2ZWI5	7;7;7	_________MAGLTKNRSTSACRLCFILLLV	X;X;X;X;X;X;X;X;X;X;X;X;X;X;X;Deamidation 18O (N);X;X;X;X;X;X;X;X;X;X;X;X;X;X;X	XXXXXXXXXXPPPPPPPXXXXXXXXXXXXXX	2	22.929	AGLTKN(22.93)R	AGLTKN(1)R	6	0	2478700	LOC_Os01g48660	expressed protein
Q8LH60	Q8LH60	8	________MALSFLPNFGNYKRNPAKILVSY	X;X;X;X;X;X;X;X;X;X;X;X;X;X;X;Deamidation 18O (N);X;X;X;X;X;X;X;X;X;X;X;X;X;X;X	XXXXXXXXXPPPPPPPPPPPPPXXXXXXXXX	2	15.266	ALSFLPN(15.27)FGN(-15.27)YKR	ALSFLPN(0.971)FGN(0.029)YKR	7	0	1920300	BAC05660.1	Uncharacterized protein
A0A0E0I7R2	A0A0E0I7R2;Q6Z4U4;B8BB68;Q7XV05;Q01JP8;A2XU70;A0A0E0H1M8	149;149;149;155;155;155;155	DSLGNLLKLRFLRLNNNSLSGSIPKSLTAIT	X;X;X;X;X;X;X;X;X;X;X;X;X;X;X;Deamidation 18O (N);X;X;X;X;X;X;X;X;X;X;X;X;X;X;X	XXXXXXXXXXXXXPPPPPPPPPPPPXXXXXX	2	140.49	LN(-58.48)N(28.13)N(-28.13)SLSGSIPK	LNN(0.998)N(0.002)SLSGSIPK	3	61011000	0	LOC_Os08g07760	BRASSINOSTEROID INSENSITIVE 1-associated receptor kinase 1 precursor, putative, expressed
A0A0P0VYC3	A0A0P0VYC3;Q84MU6;A2XHN5;A3AIT4	292;292;292;292	QSPPRQPSTRNPRNRNRNPPIGSNGDNGGNG	X;X;X;X;X;X;X;X;X;X;X;X;X;X;X;Deamidation 18O (N);X;Deamidation 18O (N);X;X;X;X;X;Deamidation 18O (N);X;X;X;X;X;Deamidation 18O (N);X	XXXXXXXXXXXXXXXPPPPPPPPPPPPPPPP	3	10.148	N(4.77)RN(4.77)PPIGSN(4.77)GDN(-4.77)GGN(4.77)GDGSGGDGGGRSSK	N(0.857)RN(0.857)PPIGSN(0.857)GDN(0.571)GGN(0.857)GDGSGGDGGGRSSK	1	56509000	0	LOC_Os03g27990	STRUBBELIG-RECEPTOR FAMILY 7 precursor, putative, expressed
A0A0P0VYC3	A0A0P0VYC3;Q84MU6;A2XHN5;A3AIT4	294;294;294;294	PPRQPSTRNPRNRNRNPPIGSNGDNGGNGDG	X;X;X;X;X;X;X;X;X;X;X;X;X;Deamidation 18O (N);X;Deamidation 18O (N);X;X;X;X;X;Deamidation 18O (N);X;X;X;X;X;Deamidation 18O (N);X;X;X	XXXXXXXXXXXXXPPPPPPPPPPPPPPPPPP	3	10.148	N(4.77)RN(4.77)PPIGSN(4.77)GDN(-4.77)GGN(4.77)GDGSGGDGGGRSSK	N(0.857)RN(0.857)PPIGSN(0.857)GDN(0.571)GGN(0.857)GDGSGGDGGGRSSK	3	56509000	0	LOC_Os03g27990	STRUBBELIG-RECEPTOR FAMILY 7 precursor, putative, expressed
A0A0P0VYC3	A0A0P0VYC3;Q84MU6;A2XHN5;A3AIT4	300;300;300;300	TRNPRNRNRNPPIGSNGDNGGNGDGSGGDGG	X;X;X;X;X;X;X;Deamidation 18O (N);X;Deamidation 18O (N);X;X;X;X;X;Deamidation 18O (N);X;X;X;X;X;Deamidation 18O (N);X;X;X;X;X;X;X;X;X	XXXXXXXPPPPPPPPPPPPPPPPPPPPPPPP	3	10.148	N(4.77)RN(4.77)PPIGSN(4.77)GDN(-4.77)GGN(4.77)GDGSGGDGGGRSSK	N(0.857)RN(0.857)PPIGSN(0.857)GDN(0.571)GGN(0.857)GDGSGGDGGGRSSK	9	56509000	0	LOC_Os03g27990	STRUBBELIG-RECEPTOR FAMILY 7 precursor, putative, expressed
A0A0P0VYC3	A0A0P0VYC3;Q84MU6;A2XHN5;A3AIT4	306;306;306;306	RNRNPPIGSNGDNGGNGDGSGGDGGGRSSKI	X;Deamidation 18O (N);X;Deamidation 18O (N);X;X;X;X;X;Deamidation 18O (N);X;X;X;X;X;Deamidation 18O (N);X;X;X;X;X;X;X;X;X;X;X;X;X;X;X	XPPPPPPPPPPPPPPPPPPPPPPPPPPPPPX	3	10.148	N(4.77)RN(4.77)PPIGSN(4.77)GDN(-4.77)GGN(4.77)GDGSGGDGGGRSSK	N(0.857)RN(0.857)PPIGSN(0.857)GDN(0.571)GGN(0.857)GDGSGGDGGGRSSK	15	56509000	0	LOC_Os03g27990	STRUBBELIG-RECEPTOR FAMILY 7 precursor, putative, expressed
Q5Z7H5	Q5Z7H5;A2YE19;A0A0E0HSD7	539;539;539	SIPASIRLLVKLNSLNLSSNRISGVIPPASF	X;X;X;X;X;X;X;X;X;X;X;X;X;X;X;Deamidation 18O (N);X;X;X;X;X;X;X;X;X;X;X;X;X;X;X	XXXXXXXXXXXPPPPPPPPPPXXXXXXXXXX	2	186.16	LN(-110.09)SLN(56.69)LSSN(-56.69)R	LNSLN(1)LSSNR	5	31795000	0	LOC_Os06g36270	receptor-like protein kinase 5 precursor, putative, expressed
Q2QRC4	Q2QRC4;A0A0P0YA47;B8BPJ6;A0A0E0JA48	136;136;136;136	KDYYAVEEVKRVERYNLDVDECISSNPRQID	X;X;X;X;X;X;X;X;X;X;X;X;X;X;X;Deamidation 18O (N);X;X;X;X;X;X;X;X;X;Deamidation 18O (N);X;X;X;X;X	XXXXXXXXXXXPPPPPPPPPPPPPPPPPXXX	2	37.681	VERYN(37.68)LDVDECISSN(37.68)PR	VERYN(1)LDVDECISSN(1)PR	5	560970000	0	LOC_Os12g28050	NBS-LRR disease resistance protein, putative, expressed
Q2QRC4	Q2QRC4;A0A0P0YA47;B8BPJ6;A0A0E0JA48	146;146;146;146	RVERYNLDVDECISSNPRQIDEIDDDISPVL	X;X;X;X;X;Deamidation 18O (N);X;X;X;X;X;X;X;X;X;Deamidation 18O (N);X;X;X;X;X;X;X;X;X;X;X;X;X;X;X	XPPPPPPPPPPPPPPPPPXXXXXXXXXXXXX	2	37.681	VERYN(37.68)LDVDECISSN(37.68)PR	VERYN(1)LDVDECISSN(1)PR	15	560970000	0	LOC_Os12g28050	NBS-LRR disease resistance protein, putative, expressed
A0A0P0VM23	A0A0P0VM23;Q6K7X0	169;547	NIPVTFGDLKSLGVLNLSHNSLSGTIPTTLN	X;X;X;X;X;X;X;X;X;X;X;X;X;X;X;Deamidation 18O (N);X;X;X;X;X;X;X;X;X;X;X;X;X;X;X	XXXXXXXXXXPPPPPPPPPPPPPPPPPPPPP	3	110.48	SLGVLN(9.53)LSHN(-9.53)SLSGTIPTTLN(-73.27)DLPVMSK	SLGVLN(0.9)LSHN(0.1)SLSGTIPTTLNDLPVMSK	6	84042000	0	LOC_Os02g40240	receptor kinase, putative, expressed
A0A0P0VM23	A0A0P0VM23;Q6K7X0	119;497	EGVIPPELSYLKQLINLSLSENKLTGEIPGT	X;X;X;X;X;X;X;X;X;X;X;X;X;X;X;Deamidation 18O (N);X;X;X;X;X;X;X;X;X;X;X;X;X;X;X	XXXXXXXXXXXXPPPPPPPPPPPXXXXXXXX	2	256.24	QLIN(165.17)LSLSEN(-165.17)K	QLIN(1)LSLSENK	4	37070000	0	LOC_Os02g40240	receptor kinase, putative, expressed
B8BNN7	B8BNN7;A0A0E0HYT0;Q2QVT8;Q2QVQ5	246;212;214;214	TNLQELRLGMVDMSSNGARWCDAIARFSPKL	X;X;X;X;X;X;X;X;X;X;X;X;X;X;X;Deamidation 18O (N);X;X;X;X;X;X;X;X;X;X;X;X;X;X;X	XXXXXXXPPPPPPPPPPPPXXXXXXXXXXXX	2	65.224	LGMVDMSSN(65.22)GAR	LGMVDMSSN(1)GAR	9	43895000	0	LOC_Os12g12010	verticillium wilt disease resistance protein precursor, putative, expressed
A0A0E0G3S7	A0A0E0G3S7;Q6H5Y1;A2X2N4;A2X2M5	303;521;521;522	SIPPSIKSLTSLTSLNLSRNQISGEIPAAVG	X;X;X;X;X;X;X;X;X;X;X;X;X;X;X;Deamidation 18O (N);X;X;X;X;X;X;X;X;X;X;X;X;X;X;X	XXXXXXXPPPPPPPPPPPPXXXXXXXXXXXX	2	185.29	SLTSLTSLN(185.29)LSR	SLTSLTSLN(1)LSR	9	21230000	0	LOC_Os02g13510	receptor-like protein kinase 5 precursor, putative, expressed
A0A0P0WU77	A0A0P0WU77;A2YAY0;B9FSB6;Q67WJ3;A0A0E0HMZ9	164;466;701;840;880	PRWPHRKMKSLQTLINNVQVLQEASKANNEE	X;X;X;X;X;X;X;Oxidation (M);X;X;X;X;X;X;X;Deamidation 18O (N);X;X;X;X;X;X;X;X;X;X;X;X;X;X;X	XXXXXXXPPPPPPPPPPPPPPPPPPPXXXXX	3	30.042	MKSLQTLIN(0)N(0)VQVLQEASK	MKSLQTLIN(0.5)N(0.5)VQVLQEASK	9	383540000	0	LOC_Os06g12360	pentatricopeptide, putative, expressed
A0A0P0WU77	A0A0P0WU77;A2YAY0;B9FSB6;Q67WJ3;A0A0E0HMZ9	165;467;702;841;881	RWPHRKMKSLQTLINNVQVLQEASKANNEEQ	X;X;X;X;X;X;X;X;X;X;X;X;X;X;X;X;X;X;X;X;X;X;X;X;X;X;X;X;X;X;X	XXXXXXXXXXXXXXXXXXXXXXXXXXXXXXX	3	30.042	MKSLQTLIN(0)N(0)VQVLQEASK	MKSLQTLIN(0.5)N(0.5)VQVLQEASK	10	383540000	0	LOC_Os06g12360	pentatricopeptide, putative, expressed
B9F983	B9F983;A2XIE6;Q10IY6;A0A0E0GPH9;Q8S693	403;384;403;398;403	NHAIKIGHESDLFVGNALMDFYAKCNDMDSS	X;X;X;X;X;X;X;X;X;X;X;X;X;X;X;Deamidation 18O (N);X;X;X;X;X;X;X;X;X;Deamidation 18O (N);X;Oxidation (M);X;X;X	XXXXXPPPPPPPPPPPPPPPPPPPPPPPPPP	3	16.4	IGHESDLFVGN(16.4)ALMDFYAKCN(16.4)DMDSSLK	IGHESDLFVGN(1)ALMDFYAKCN(1)DMDSSLK	11	23590000	0	LOC_Os03g32620	pentatricopeptide, putative, expressed
B9F983	B9F983;A2XIE6;Q10IY6;A0A0E0GPH9;Q8S693	413;394;413;408;413	DLFVGNALMDFYAKCNDMDSSLKIFSSLRDA	X;X;X;X;X;Deamidation 18O (N);X;X;X;X;X;X;X;X;X;Deamidation 18O (N);X;Oxidation (M);X;X;X;X;X;X;X;X;X;X;X;X;X	PPPPPPPPPPPPPPPPPPPPPPPXXXXXXXX	3	16.4	IGHESDLFVGN(16.4)ALMDFYAKCN(16.4)DMDSSLK	IGHESDLFVGN(1)ALMDFYAKCN(1)DMDSSLK	21	23590000	0	LOC_Os03g32620	pentatricopeptide, putative, expressed
A0A0E0FZQ4	A0A0E0FZQ4;A0A0E0FZQ5;Q67IX6;B8AGU2;A0A0E0FZQ3	188;188;185;185;188	AIVSWVNKKLAPGVQNITTVDEAEKILTGED	X;X;X;X;X;X;X;X;X;X;X;X;X;X;X;Deamidation 18O (N);X;X;X;X;X;X;X;X;X;X;X;X;X;X;X	XXXXXXXXXPPPPPPPPPPPPPPPPXXXXXX	2	142.12	LAPGVQN(142.12)ITTVDEAEK	LAPGVQN(1)ITTVDEAEK	7	182000000	0	LOC_Os02g01010	OsPDIL1-4 protein disulfide isomerase PDIL1-4, expressed
A0A0P0WGR7	A0A0P0WGR7;A0A0E0H866;B9FDT1;A0A0E0H867;B8AS57;A0A0P0WGP2	303;315;361;361;362;362	LQDFLFESDDGRRYINLTFGCPLLDTVVDDL	X;X;X;X;X;X;X;X;X;X;X;X;X;X;X;Deamidation 18O (N);X;X;X;X;X;X;X;X;X;X;X;X;X;X;X	XXXXXXXXXXXXXPPPPPPPPPPPPPPPPPP	3	174.62	YIN(97.57)LTFGCPLLDTVVDDLTIK	YIN(1)LTFGCPLLDTVVDDLTIK	3	49832000	0	LOC_Os05g23600	dolichyl-diphosphooligosaccharide--protein glycosyltransferase 67 kDasubunit precursor, putative, expressed
B8A885	B8A885	18	THERKTIDLEQGTIYNMCTQKPPHDYSQQLY	X;X;X;X;X;X;X;X;X;X;X;X;X;X;X;Deamidation 18O (N);Oxidation (M);X;X;X;X;X;X;X;X;X;X;X;X;X;X	XXXXXPPPPPPPPPPPPPPPPXXXXXXXXXX	3	26.148	TIDLEQGTIYN(26.15)MCTQK	TIDLEQGTIYN(1)MCTQK	11	4514600	0	LOC_Os01g27150	cullin, putative, expressed
B8B9Y0	B8B9Y0;Q6Z1Y4;A0A0E0I688	272;352;352	SKEMGISVGIKHKKINVSNPRVAWEHEQFSR	X;X;X;X;X;X;X;X;X;X;X;X;X;X;X;Deamidation 18O (N);X;X;X;X;X;X;X;X;X;X;X;X;X;X;X	XXXXXXXXXXXXXXPPPPPPPXXXXXXXXXX	2	128.38	IN(91.83)VSN(-91.83)PR	IN(1)VSNPR	2	95952000	0	LOC_Os08g01180	nicalin, putative, expressed
Q56UM4	Q56UM4;A0A0E0H3L3;Q01IH0;Q9LKJ0;A0A0E0H3L2;Q0JBF1;Q7XU69;B9FGC5;B8ASN8	127;498;623;626;627;630;640;647;647	PTKAIYESAKIFLFNNATNVRVTAKSLKIWE	X;X;X;X;X;X;X;X;X;X;X;X;X;X;X;Deamidation 18O (N);X;X;X;X;X;X;X;X;X;X;X;X;X;X;X	XXXXXXXXXXPPPPPPPPPPPXXXXXXXXXX	2	159.28	IFLFN(-15.19)N(15.19)ATN(-55.22)VR	IFLFN(0.029)N(0.971)ATNVR	6	16942000	0	LOC_Os04g45290	glycosyl hydrolases, putative, expressed
B9F0D3	B9F0D3;D5L616;D5L625;D5L605;D5L5Y8;Q0E0P0;D5L630;D5L626;D5L620;D5L613;D5L603;D5L5Z7;A2X5P7;A0A0E0G7S1;D5L609;D5L5Z3;D5L618;D5L628;D5L636;D5L633;D5L604;D5L601	152;320;333;333;332;333;333;333;333;333;333;333;333;330;333;322;323;326;333;333;333;333	FFDPVKHRRILLGWANESDSVTYDKAKGWAG	X;X;X;X;X;X;X;X;X;X;X;X;X;X;X;Deamidation 18O (N);X;X;X;X;X;X;X;X;X;X;X;X;X;X;X	XXXXXXXXXPPPPPPPPPPPPPPPPXXXXXX	2	81.494	ILLGWAN(81.49)ESDSVTYDK	ILLGWAN(1)ESDSVTYDK	7	5599400	0	LOC_Os02g33110	glycosyl hydrolases, putative, expressed
Q0DN33	Q0DN33;A3AN81;Q8S7I3;A0A0E0IT90	72;85;156;156	DKSPYYKLKAVLPDSNVTVASQKKIEDKLNV	X;X;X;X;X;X;X;X;X;X;X;X;X;X;X;Deamidation 18O (N);X;X;X;X;X;X;X;X;X;X;X;X;X;X;X	XXXXXXXXXPPPPPPPPPPPPPPXXXXXXXX	2	92.866	AVLPDSN(92.87)VTVASQK	AVLPDSN(1)VTVASQK	7	21284000	0	LOC_Os03g56620	expressed protein
A0A0E0INI0	A0A0E0INI0	303	KTGLFSGHGKSIGHINNPVYSSDIHNEVGRF	X;X;X;X;X;X;X;X;X;X;X;X;X;X;X;Deamidation 18O (N);X;X;X;X;X;X;X;X;X;Deamidation 18O (N);X;X;X;X;X	XXXXXXXXXXPPPPPPPPPPPPPPPPPPPPP	4	17.734	SIGHIN(0)N(0)PVYSSDIHN(8.52)EVGRFTSVEK	SIGHIN(0.533)N(0.533)PVYSSDIHN(0.934)EVGRFTSVEK	6	89606000	0	LOC_Os09g38440	ATXR, putative, expressed
A0A0E0INI0	A0A0E0INI0	304	TGLFSGHGKSIGHINNPVYSSDIHNEVGRFT	X;X;X;X;X;X;X;X;X;X;X;X;X;X;X;X;X;X;X;X;X;X;X;X;X;X;X;X;X;X;X	XXXXXXXXXXXXXXXXXXXXXXXXXXXXXXX	4	17.734	SIGHIN(0)N(0)PVYSSDIHN(8.52)EVGRFTSVEK	SIGHIN(0.533)N(0.533)PVYSSDIHN(0.934)EVGRFTSVEK	7	89606000	0	LOC_Os09g38440	ATXR, putative, expressed
A0A0E0INI0	A0A0E0INI0	313	SIGHINNPVYSSDIHNEVGRFTSVEKLVNKP	X;X;X;X;X;Deamidation 18O (N);X;X;X;X;X;X;X;X;X;Deamidation 18O (N);X;X;X;X;X;X;X;X;X;X;X;X;X;X;X	PPPPPPPPPPPPPPPPPPPPPPPPPPXXXXX	4	17.734	SIGHIN(0)N(0)PVYSSDIHN(8.52)EVGRFTSVEK	SIGHIN(0.533)N(0.533)PVYSSDIHN(0.934)EVGRFTSVEK	16	89606000	0	LOC_Os09g38440	ATXR, putative, expressed
B8B1C4	B8B1C4	84	AEIKSTPSTKRKKHCNCKNSQCLKLQEAITV	X;X;X;X;X;X;X;X;X;X;X;X;X;X;X;Deamidation 18O (N);X;X;X;X;X;X;X;X;X;X;X;X;X;X;X	XXXXXXXXXXXXXPPPPPPPPPPPPPPPPPP	2	40.767	HCN(0)CKN(0)SQCLKLQEAITVR	HCN(0.5)CKN(0.5)SQCLKLQEAITVR	3	50006000	0	LOC_Os06g22670	tesmin/TSO1-like CXC domain containing protein, expressed
B8B1C4	B8B1C4	87	KSTPSTKRKKHCNCKNSQCLKLQEAITVRSN	X;X;X;X;X;X;X;X;X;X;X;X;X;X;X;X;X;X;X;X;X;X;X;X;X;X;X;X;X;X;X	XXXXXXXXXXXXXXXXXXXXXXXXXXXXXXX	2	40.767	HCN(0)CKN(0)SQCLKLQEAITVR	HCN(0.5)CKN(0.5)SQCLKLQEAITVR	6	50006000	0	LOC_Os06g22670	tesmin/TSO1-like CXC domain containing protein, expressed
B9F3R3	B9F3R3;Q6ZIF9;A0A0E0G2Y8;A2X1S4	61;150;150;151	LLNGPTLLVDTPRNTNITAKAMESLNIPKGV	X;X;X;X;X;X;X;X;X;X;X;X;X;X;X;Deamidation 18O (N);X;X;X;X;X;X;X;X;X;X;X;X;X;X;X	XXXXXXXXXXXXXPPPPPPPXXXXXXXXXXX	1	90.709	N(-15.47)TN(15.47)ITAK	N(0.028)TN(0.972)ITAK	3	47648000	0	LOC_Os02g09420	cyclase family protein, putative, expressed
A2X9G0	A2X9G0;A0A0E0HLF7;A0A0E0HLF6;A0A0E0HLF5	260;261;261;261	RVTSPAGATRCVDAANDLARGFNSGLRSAMA	X;X;X;X;X;X;X;X;X;X;X;X;X;X;X;Deamidation 18O (N);X;X;X;X;X;X;X;X;X;X;X;X;X;X;X	XPPPPPPPPPPPPPPPPPPPXXXXXXXXXXX	2	42.083	VTSPAGATRCVDAAN(42.08)DLAR	VTSPAGATRCVDAAN(1)DLAR	15	44880000	0	LOC_Os02g50690	GDSL-like lipase/acylhydrolase, putative, expressed
A0A0E0FUC8	A0A0E0FUC8;Q5ZBR5;Q0JIK5;A3AQF7;A2WVY3	2437;361;361;378;454	KNDTESRFESLVNGGNCSREALNGTSINGKV	X;X;X;X;X;X;X;X;X;X;X;X;X;X;X;Deamidation 18O (N);X;X;X;X;X;X;X;X;X;X;X;X;X;X;X	XXXXXXXPPPPPPPPPPPPXXXXXXXXXXXX	2	111.27	FESLVN(-17.6)GGN(17.6)CSR	FESLVN(0.017)GGN(0.983)CSR	9	42494000	0	LOC_Os01g58280	OsSub8 - Putative Subtilisin homologue, expressed
B9FF86	B9FF86;Q7XQQ3;Q01JS1;A0A0E0H0Z0;Q0JD53	145;200;200;200;201	ASRYGADVGLRQRGLNISDDDYDSPRDYYGH	X;X;X;X;X;X;X;X;X;X;X;X;X;X;X;Deamidation 18O (N);X;X;X;X;X;X;X;X;X;X;X;X;X;X;X	XXXXXXXXXXXXXPPPPPPPPPPPPPXXXXX	2	65.395	GLN(65.4)ISDDDYDSPR	GLN(1)ISDDDYDSPR	3	10398000	0	LOC_Os04g35140	OsSub41 - Putative Subtilisin homologue, expressed
A0A0P0VHD1	A0A0P0VHD1;A0A0E0G4S4;Q6ERT3;A2X3A8	112;143;176;176	VPARWKGVCQTGDAFNTTNCNRKIIGARWYS	X;X;X;X;X;X;X;X;X;X;X;X;X;X;X;Deamidation 18O (N);X;X;X;X;X;X;X;X;X;X;X;X;X;X;X	XXXXXXPPPPPPPPPPPPPPPPXXXXXXXXX	2	67.456	GVCQTGDAFN(23.91)TTN(-23.91)CN(-31.81)R	GVCQTGDAFN(0.995)TTN(0.004)CN(0.001)R	10	6355700	0	LOC_Os02g16940	OsSub13 - Putative Subtilisin homologue, expressed
Q6ZIW1	Q6ZIW1;B8BAI3;A0A0E0IBI2	168;168;168	FQVINDTQIKYGIQTNSTPVARRGTYEDPTF	X;X;X;X;X;X;X;X;X;X;X;X;X;X;X;Deamidation 18O (N);X;X;X;X;X;X;X;X;X;X;X;X;X;X;X	XXXXXXXXXXPPPPPPPPPPPPXXXXXXXXX	2	140.45	YGIQTN(140.45)STPVAR	YGIQTN(1)STPVAR	6	66201000	0	LOC_Os08g30740	ABC transporter, ATP-binding protein, putative, expressed
B9F714	B9F714;Q10BC6;A0A0E0GVR1;A0A0E0GVR0;B8AMC6	85;85;85;85;85	AAAATATSNPRLRVRNPDPNPPRPNYSRRRF	X;X;X;X;X;X;X;X;X;X;X;X;X;X;X;Deamidation 18O (N);X;X;X;Deamidation 18O (N);X;X;X;X;Deamidation 18O (N);X;X;X;X;X;X	XXXXXXXXXXXXXXXPPPPPPPPPPPPPPXX	2	34.692	N(34.69)PDPN(34.69)PPRPN(34.69)YSRR	N(1)PDPN(1)PPRPN(1)YSRR	1	39775000	0	LOC_Os03g60820	transporter, major facilitator superfamily domain containing protein, expressed
B9F714	B9F714;Q10BC6;A0A0E0GVR1;A0A0E0GVR0;B8AMC6	89;89;89;89;89	TATSNPRLRVRNPDPNPPRPNYSRRRFFYPG	X;X;X;X;X;X;X;X;X;X;X;Deamidation 18O (N);X;X;X;Deamidation 18O (N);X;X;X;X;Deamidation 18O (N);X;X;X;X;X;X;X;X;X;X	XXXXXXXXXXXPPPPPPPPPPPPPPXXXXXX	2	34.692	N(34.69)PDPN(34.69)PPRPN(34.69)YSRR	N(1)PDPN(1)PPRPN(1)YSRR	5	39775000	0	LOC_Os03g60820	transporter, major facilitator superfamily domain containing protein, expressed
B9F714	B9F714;Q10BC6;A0A0E0GVR1;A0A0E0GVR0;B8AMC6	94;94;94;94;94	PRLRVRNPDPNPPRPNYSRRRFFYPGARCGH	X;X;X;X;X;X;Deamidation 18O (N);X;X;X;Deamidation 18O (N);X;X;X;X;Deamidation 18O (N);X;X;X;X;X;X;X;X;X;X;X;X;X;X;X	XXXXXXPPPPPPPPPPPPPPXXXXXXXXXXX	2	34.692	N(34.69)PDPN(34.69)PPRPN(34.69)YSRR	N(1)PDPN(1)PPRPN(1)YSRR	10	39775000	0	LOC_Os03g60820	transporter, major facilitator superfamily domain containing protein, expressed
A0A0P0VSK4	A0A0P0VSK4	5	___________MIGHNNDEFDDQSISNTETT	X;X;X;X;X;X;X;X;X;X;X;X;X;X;X;Deamidation 18O (N);Deamidation 18O (N);X;X;X;X;X;X;X;X;X;X;X;X;X;X	XXXXXXXXXXXPPPPPPPPPPPPPPPPPPPP	3	11.46	MIGHN(10.3)N(10.3)DEFDDQSISN(-10.3)TETTK	MIGHN(0.921)N(0.921)DEFDDQSISN(0.157)TETTK	5	3599300	0	LOC_Os03g03680	transporter family protein, putative, expressed
A0A0P0VSK4	A0A0P0VSK4	6	__________MIGHNNDEFDDQSISNTETTK	X;X;X;X;X;X;X;X;X;X;X;X;X;X;Deamidation 18O (N);Deamidation 18O (N);X;X;X;X;X;X;X;X;X;X;X;X;X;X;X	XXXXXXXXXXPPPPPPPPPPPPPPPPPPPPP	3	11.46	MIGHN(10.3)N(10.3)DEFDDQSISN(-10.3)TETTK	MIGHN(0.921)N(0.921)DEFDDQSISN(0.157)TETTK	6	3599300	0	LOC_Os03g03680	transporter family protein, putative, expressed
A0A0E0HSC6	A0A0E0HSC6;A0A0E0HSC4;A0A0E0HSC3;A0A0E0HSC2;A0A0E0HSB5;A0A0E0HSC0;A0A0E0HSB9;A0A0E0HSC1	681;723;734;739;781;781;792;819	YNEQIHDLLGNSGLENRSVGATALNERSSRS	X;X;X;X;X;X;X;X;X;X;X;X;X;X;X;Deamidation 18O (N);X;X;X;X;X;X;X;X;X;X;X;X;X;X;X	PPPPPPPPPPPPPPPPPXXXXXXXXXXXXXX	3	14.931	RDTVMYKVSVQMIEIYN(-5.63)EQIHDLLGN(-5.63)SGLEN(5.63)R	RDTVMYKVSVQMIEIYN(0.177)EQIHDLLGN(0.177)SGLEN(0.646)R	31	38173000	0	LOC_Os06g36080	kinesin motor domain containing protein, expressed
B9EWR1	B9EWR1	12	____MLHLASISAQPNPWCKKQCGDVKIPYP	X;X;X;X;X;X;X;X;X;X;X;X;X;X;X;Deamidation 18O (N);X;X;X;X;X;X;X;X;X;X;X;X;X;X;X	XXXXXPPPPPPPPPPPPPPPPXXXXXXXXXX	2	60.598	LHLASISAQPN(29.94)PWCKK	LHLASISAQPN(1)PWCKK	11	30509000	0	LOC_Os01g26270	OsWAK7 - OsWAK receptor-like protein kinase, expressed
A0A0P0Y2W5	A0A0P0Y2W5;A0A0P0Y2V3;A0A0P0Y2R8;A0A0E0J2I3;A0A0E0J2I2;H2KW82;Q2R3E0;B8BKT7	317;439;711;780;810;825;827;829	RRLLHDDGRGVAEALNETTCFDNQCEGLVIQ	X;X;X;X;X;X;X;X;X;X;X;X;X;X;X;Deamidation 18O (N);X;X;X;X;X;X;X;X;X;X;X;X;X;X;X	XXXXXXXXXPPPPPPPPPPPPPPPPPPPPPP	3	70.315	GVAEALN(11.95)ETTCFDN(-11.95)QCEGLVIQGK	GVAEALN(0.94)ETTCFDN(0.06)QCEGLVIQGK	7	29985000	0	LOC_Os11g32260	lysosomal alpha-mannosidase precursor, putative, expressed
Q259L9	Q259L9;Q9ST80;Q7XSV2;Q5U1N4;B8ARU3;O22510;B7E5B5	251;277;281;281;281;281;62	GIFKSDQGLIEDAQTNRTAVRFALNQAAFFD	X;X;X;X;X;X;X;X;X;X;X;X;X;X;X;Deamidation 18O (N);X;X;X;X;X;X;X;X;X;X;X;X;X;X;X	XXXXPPPPPPPPPPPPPXXXXXXXXXXXXXX	2	147.62	SDQGLIEDAQTN(147.62)R	SDQGLIEDAQTN(1)R	12	25077000	0	LOC_Os04g59150	peroxidase precursor, putative, expressed
Q7FB12	Q7FB12;A2XVZ1;A0A0E0H3N2	56;56;56	QQQQVKEEEEEAAVENLPPPPQEEEQRRERK	X;X;X;X;X;X;X;X;X;X;X;X;X;X;X;Deamidation 18O (N);X;X;X;X;X;X;X;X;X;X;X;X;X;X;X	PPPPPPPPPPPPPPPPPPPPPPPPPPPXXXX	3	43.438	AQDQQQQVKEEEEEAAVEN(43.44)LPPPPQEEEQR	AQDQQQQVKEEEEEAAVEN(1)LPPPPQEEEQR	19	22396000	0	LOC_Os04g45600	NDH-M H PLASTOQUINONE DEHY, putative, expressed
A0A0E0G0T4	A0A0E0G0T4;A2X0M8;A0A0E0G0T5;A0A0P0VEJ5;A0A0E0G0T3	193;188;193;195;193	LVTTAPLLRVSGEVANLCNALRAVSLRGAGI	X;X;X;X;X;X;X;X;X;X;X;X;X;X;X;Deamidation 18O (N);X;X;Deamidation 18O (N);X;X;X;X;X;X;X;X;X;X;X;X	XXXXXXXXXPPPPPPPPPPPPPXXXXXXXXX	2	45.997	VSGEVAN(46)LCN(46)ALR	VSGEVAN(1)LCN(1)ALR	7	19936000	0	LOC_Os02g04340	NIN-like protein 2, putative, expressed
A0A0E0G0T4	A0A0E0G0T4;A2X0M8;A0A0E0G0T5;A0A0P0VEJ5;A0A0E0G0T3	196;191;196;198;196	TAPLLRVSGEVANLCNALRAVSLRGAGICNR	X;X;X;X;X;X;X;X;X;X;X;X;Deamidation 18O (N);X;X;Deamidation 18O (N);X;X;X;X;X;X;X;X;X;X;X;X;X;X;X	XXXXXXPPPPPPPPPPPPPXXXXXXXXXXXX	2	45.997	VSGEVAN(46)LCN(46)ALR	VSGEVAN(1)LCN(1)ALR	10	19936000	0	LOC_Os02g04340	NIN-like protein 2, putative, expressed
A2X6L9	A2X6L9;Q6YY47;Q6YY46	95;95;95	TRDGAGICLPDIRMDNCTNIANVYPKGKKTY	X;X;X;X;X;X;X;X;X;X;X;X;X;Oxidation (M);X;Deamidation 18O (N);X;X;X;X;X;X;X;X;X;X;X;X;X;X;X	XXXXXXXXXXXXXPPPPPPPPPPPPPXXXXX	2	108.37	MDN(31.21)CTN(-31.21)IAN(-61.11)VYPK	MDN(0.999)CTN(0.001)IANVYPK	3	18796000	0	LOC_Os02g37590	glycerophosphoryl diester phosphodiesterase family protein, putative, expressed
A2X6L9	A2X6L9;Q6YY47;A0A0E0G907	494;534;532	GYSKQTAQKVMIQSTNSSVLVKFKEQTKYNL	X;X;X;X;X;X;X;X;X;X;Oxidation (M);X;X;X;X;Deamidation 18O (N);X;X;X;X;X;X;X;X;X;X;X;X;X;X;X	XXXXXXXXXPPPPPPPPPPPPPXXXXXXXXX	2	96.229	VMIQSTN(70.94)SSVLVK	VMIQSTN(1)SSVLVK	7	12759000	0	LOC_Os02g37590	glycerophosphoryl diester phosphodiesterase family protein, putative, expressed
Q67U60	Q67U60;B9G3W4;B8BCG6;A0A0E0IKG3	454;473;473;483	IEFRDAVKGNNIAHSNTSCRDIWTEYHELGW	X;X;X;X;X;X;X;X;X;X;X;X;X;X;X;Deamidation 18O (N);X;X;X;X;X;X;X;X;X;X;X;X;X;X;X	XXXXXXXXPPPPPPPPPPPPXXXXXXXXXXX	3	60.08	GN(-55.77)N(-46.35)IAHSN(46.35)TSCR	GNNIAHSN(1)TSCR	8	16316000	0	LOC_Os09g27210	lecithine cholesterol acyltransferase, putative, expressed
A2WLE4	A2WLE4;Q9AQZ5;A0A0E0FH59	491;523;523	EPPKDSAKMETDDAPNEAASGTDVNMQEAKA	X;X;X;X;X;X;X;X;X;X;X;X;X;X;X;Deamidation 18O (N);X;X;X;X;X;X;X;X;Deamidation 18O (N);Oxidation (M);X;X;X;X;X	XXXXXXXXPPPPPPPPPPPPPPPPPPPPPPX	3	40.756	METDDAPN(40.76)EAASGTDVN(40.76)MQEAK	METDDAPN(1)EAASGTDVN(1)MQEAK	8	13252000	0	LOC_Os01g08560	DnaK family protein, putative, expressed
A2WLE4	A2WLE4;Q9AQZ5;A0A0E0FH59	500;532;532	ETDDAPNEAASGTDVNMQEAKAPADAAADGA	X;X;X;X;X;X;Deamidation 18O (N);X;X;X;X;X;X;X;X;Deamidation 18O (N);Oxidation (M);X;X;X;X;X;X;X;X;X;X;X;X;X;X	PPPPPPPPPPPPPPPPPPPPPXXXXXXXXXX	3	40.756	METDDAPN(40.76)EAASGTDVN(40.76)MQEAK	METDDAPN(1)EAASGTDVN(1)MQEAK	17	13252000	0	LOC_Os01g08560	DnaK family protein, putative, expressed
A0A0E0IY29	A0A0E0IY29	8	________MASMEPLNRMVRMVARAFYDDVS	X;X;X;X;X;X;X;X;X;X;X;Oxidation (M);X;X;X;Deamidation 18O (N);X;X;X;X;X;X;X;X;X;X;X;X;X;X;X	XXXXXXXXXPPPPPPPPPPPXXXXXXXXXXX	2	21.464	ASMEPLN(21.46)RMVR	ASMEPLN(1)RMVR	7	12420000	0	LOC_Os08g25460	transcription initiation factor, putative, expressed
A0A0E0I4K1	A0A0E0I4K1;A0A0P0X906	33;33	LGCSKMQSLKPGKYINKPSGNANTKCRGAVT	X;X;X;X;X;X;X;X;X;X;X;X;X;X;X;Deamidation 18O (N);X;X;X;X;X;X;X;X;X;X;X;X;X;X;X	XXXXXXXXXXXXXPPPPPPPPPPPPXXXXXX	2	61.78	YIN(6.72)KPSGN(-6.72)AN(-24.59)TK	YIN(0.822)KPSGN(0.175)AN(0.003)TK	3	239910000	0	LOC_Os01g08680	myb/SANT domain protein, putative, expressed
Q7F1U0	Q7F1U0;Q43006;O22438;Q5U1I2;B9FUV8;A2YPX2;A0A0E0I5P1;A0A0E0I5P0	171;171;171;178;178;178;410;410	TDLPAPSSSLAELIGNFSRKGLDATDMVALS	X;X;X;X;X;X;X;X;X;X;X;X;X;X;X;Deamidation 18O (N);X;X;X;X;X;X;X;X;X;X;X;X;X;X;X	PPPPPPPPPPPPPPPPPPPXXXXXXXXXXXX	2	238.64	DSTTASEALAN(-172.62)TDLPAPSSSLAELIGN(172.62)FSR	DSTTASEALANTDLPAPSSSLAELIGN(1)FSR	27	239260000	0	LOC_Os07g48020	peroxidase precursor, putative, expressed
H2KX66	H2KX66;Q2QM23;B8BN22;B9GEC0;A0A0E0G9H1;A0A0N7KUD7	259;263;263;231;263;77	TEPSAPKAAAAAPVENSADKGPHQDSQPPSA	X;X;X;X;X;X;X;X;X;X;X;X;X;X;X;Deamidation 18O (N);X;X;X;X;X;X;X;X;X;X;X;X;X;X;X	XXXXXXXPPPPPPPPPPPPPPPPPPPPPPPP	4	44.365	AAAAAPVEN(44.37)SADKGPHQDSQPPSAAAPAK	AAAAAPVEN(1)SADKGPHQDSQPPSAAAPAK	9	11635000	0	LOC_Os12g42550	methyl-CpG binding domain containing protein, putative, expressed
Q10P01	Q10P01;A2XEM2;A0A0E0GJT4;A0A0E0GJT2	9;9;9;9	_______MDMALPIVNATAAVLARVSAAFNA	X;X;X;X;X;X;X;Oxidation (M);X;Oxidation (M);X;X;X;X;X;Deamidation 18O (N);X;X;X;X;X;X;X;X;X;X;X;X;X;X;X	XXXXXXXPPPPPPPPPPPPPPPPPXXXXXXX	2	54.199	MDMALPIVN(54.2)ATAAVLAR	MDMALPIVN(1)ATAAVLAR	9	10673000	0	LOC_Os03g14800	serine palmitoyltransferase 1, putative, expressed
A3C669	A3C669;A0A0E0IUS1;Q8LNG5;A2Z914	11;11;65;65	_____MLSGLDDGLENRRGGSDWGWRGGFRN	X;X;X;X;X;X;X;X;X;X;X;X;X;X;X;Deamidation 18O (N);X;X;X;X;X;X;X;X;X;X;X;X;X;X;X	XXXXXPPPPPPPPPPPPPXXXXXXXXXXXXX	2	26.598	MLSGLDDGLEN(26.6)RR	MLSGLDDGLEN(1)RR	11	10113000	0	LOC_Os10g35690	ribosomal protein S18 containing protein, expressed
A0A0P0VZK8	A0A0P0VZK8	4	____________MRRNTVLNLGVEEGGNHGY	X;X;X;X;X;X;X;X;X;X;X;X;X;X;X;Deamidation 18O (N);X;X;X;Deamidation 18O (N);X;X;X;X;X;X;X;Deamidation 18O (N);X;X;X	XXXXXXXXXXXXPPPPPPPPPPPPPPPPPPP	3	15.09	MRRN(15.09)TVLN(15.09)LGVEEGGN(15.09)HGYR	MRRN(1)TVLN(1)LGVEEGGN(1)HGYR	4	9814100	0	LOC_Os03g30250	COBRA-like protein precursor, putative, expressed
A0A0P0VZK8	A0A0P0VZK8	8	________MRRNTVLNLGVEEGGNHGYRSGE	X;X;X;X;X;X;X;X;X;X;X;Deamidation 18O (N);X;X;X;Deamidation 18O (N);X;X;X;X;X;X;X;Deamidation 18O (N);X;X;X;X;X;X;X	XXXXXXXXPPPPPPPPPPPPPPPPPPPPXXX	3	15.09	MRRN(15.09)TVLN(15.09)LGVEEGGN(15.09)HGYR	MRRN(1)TVLN(1)LGVEEGGN(1)HGYR	8	9814100	0	LOC_Os03g30250	COBRA-like protein precursor, putative, expressed
A0A0P0VZK8	A0A0P0VZK8	16	MRRNTVLNLGVEEGGNHGYRSGEGMTQLSPL	X;X;X;Deamidation 18O (N);X;X;X;Deamidation 18O (N);X;X;X;X;X;X;X;Deamidation 18O (N);X;X;X;X;X;X;X;X;X;X;X;X;X;X;X	PPPPPPPPPPPPPPPPPPPPXXXXXXXXXXX	3	15.09	MRRN(15.09)TVLN(15.09)LGVEEGGN(15.09)HGYR	MRRN(1)TVLN(1)LGVEEGGN(1)HGYR	16	9814100	0	LOC_Os03g30250	COBRA-like protein precursor, putative, expressed
Q0D457	Q0D457	2	______________INNTNLEFFPVKNKAEI	X;X;X;X;X;X;X;X;X;X;X;X;X;X;X;Deamidation 18O (N);Deamidation 18O (N);X;X;X;X;X;X;X;X;X;Deamidation 18O (N);X;X;X;X	XXXXXXXXXXXXXXPPPPPPPPPPPPPPXXX	3	19.754	IN(9.02)N(9.02)TN(-9.02)LEFFPVKN(13.32)K	IN(0.903)N(0.903)TN(0.229)LEFFPVKN(0.964)K	2	8445600	0	LOC_Os07g45064	Phosphatidylinositol kinase and FAT containing domain protein, putative, expressed
Q0D457	Q0D457	3	_____________INNTNLEFFPVKNKAEIF	X;X;X;X;X;X;X;X;X;X;X;X;X;X;Deamidation 18O (N);Deamidation 18O (N);X;X;X;X;X;X;X;X;X;Deamidation 18O (N);X;X;X;X;X	XXXXXXXXXXXXXPPPPPPPPPPPPPPXXXX	3	19.754	IN(9.02)N(9.02)TN(-9.02)LEFFPVKN(13.32)K	IN(0.903)N(0.903)TN(0.229)LEFFPVKN(0.964)K	3	8445600	0	LOC_Os07g45064	Phosphatidylinositol kinase and FAT containing domain protein, putative, expressed
Q0D457	Q0D457	13	___INNTNLEFFPVKNKAEIFRLRGDFLLKM	X;X;X;X;Deamidation 18O (N);Deamidation 18O (N);X;X;X;X;X;X;X;X;X;Deamidation 18O (N);X;X;X;X;X;X;X;X;X;X;X;X;X;X;X	XXXPPPPPPPPPPPPPPXXXXXXXXXXXXXX	3	19.754	IN(9.02)N(9.02)TN(-9.02)LEFFPVKN(13.32)K	IN(0.903)N(0.903)TN(0.229)LEFFPVKN(0.964)K	13	8445600	0	LOC_Os07g45064	Phosphatidylinositol kinase and FAT containing domain protein, putative, expressed
A3A3S6	A3A3S6	123	ADVAPGIIRFVVGSTNASWQTNDHSGAASHD	X;X;X;X;X;X;X;X;X;X;X;X;X;X;X;Deamidation 18O (N);X;X;X;X;X;X;X;X;X;X;X;X;X;X;X	XXXXXXXXXPPPPPPPPPPPPPPPPPPPPPP	4	11.401	FVVGSTN(7.99)ASWQTN(-7.99)DHSGAASHDAAAAAPAAAVLGGGHGVPR	FVVGSTN(0.863)ASWQTN(0.137)DHSGAASHDAAAAAPAAAVLGGGHGVPR	7	8236300	0	LOC_Os02g08320	haemolysin-III, putative, expressed
A2XG18	A2XG18;Q10M97;A3AHD4;Q10MA1;Q10M98;B8AN02;A0A0N7KH60;B9F854;Q10M95;A2XG19;B9F853;B8AMZ8;A0A0E0GLM0;A0A0P0VWR5	261;109;110;159;162;209;182;190;209;209;215;215;215;244	VAFGCGLFNNGVFKSNETGIAGFGRGPLSLP	X;X;X;X;X;X;X;X;X;X;X;X;X;X;X;Deamidation 18O (N);X;X;X;X;X;X;X;X;X;X;X;X;X;X;X	XXXXXXXXXXXXXXPPPPPPPPPPPXXXXXX	2	98.048	SN(98.05)ETGIAGFGR	SN(1)ETGIAGFGR	2	7947200	0	LOC_Os03g20290	aspartic proteinase nepenthesin-1 precursor, putative, expressed
A0A0E0J8P5	A0A0E0J8P5;Q2QUP1;B8AZE1;B9FN75	56;55;56;285	DEDDCYDLLGVKQDANVSEIKKAYYKLSLKH	X;X;X;X;X;X;X;X;X;X;X;X;X;X;X;Deamidation 18O (N);X;X;X;X;X;X;X;X;X;X;X;X;X;X;X	XXXXXXXXXXXXPPPPPPPPPPXXXXXXXXX	3	71.524	QDAN(71.52)VSEIKK	QDAN(1)VSEIKK	4	7319200	0	LOC_Os12g15590	heat shock protein DnaJ, putative, expressed
A0A0P0XJA3	A0A0P0XJA3;A3BVP2;Q6ZJ18;A2YY12;A0A0E0IFQ4	149;163;179;179;179	STIAAVEGINAIRTSNLTALSEQQLVDCDTK	X;X;X;X;X;X;X;X;X;X;X;X;X;X;X;Deamidation 18O (N);X;X;X;X;X;X;X;X;X;X;X;X;X;X;X	XXXXXXXXXXXXXPPPPPPPPPPPPPPPPPP	2	100.11	TSN(100.11)LTALSEQQLVDCDTK	TSN(1)LTALSEQQLVDCDTK	3	7256300	0	LOC_Os08g44270	vignain precursor, putative, expressed
Q0E4I9	Q0E4I9;B8AGI0;A0A0E0G054	160;160;160	DELSEWIKTSSAESGNVSRALCEDISKHCQS	X;X;X;X;X;X;X;X;X;X;X;X;X;X;X;Deamidation 18O (N);X;X;X;X;X;X;X;X;X;X;X;X;X;X;X	XXXXXXXXPPPPPPPPPPPXXXXXXXXXXXX	2	101.38	TSSAESGN(101.38)VSR	TSSAESGN(1)VSR	8	7080200	0	LOC_Os02g02524	canopy homolog 2 precursor, putative, expressed
Q94GF2	Q94GF2;A2XNK4;A0A0E0GVV8	83;83;83	ILGWLSRTRPDIDGLNGTQSNRLNASDPSSP	X;X;X;X;X;X;X;X;X;X;X;X;X;X;X;Deamidation 18O (N);X;X;X;X;X;X;X;X;X;X;X;X;X;X;X	XXXXXXXPPPPPPPPPPPPPPPXXXXXXXXX	3	71.354	TRPDIDGLN(32.98)GTQSN(-32.98)R	TRPDIDGLN(0.999)GTQSN(0.001)R	9	5890700	0	LOC_Os03g61130	phosphoesterase family protein, putative, expressed
A0A0E0HFB4	A0A0E0HFB4	281	ISVSGHKKIGISAFMNSKRTIVVFERPKDEV	X;X;X;X;X;X;X;X;X;X;X;X;X;X;Oxidation (M);Deamidation 18O (N);X;X;X;X;X;X;X;X;X;X;X;X;X;X;X	XXXXXXXXPPPPPPPPPPPXXXXXXXXXXXX	3	26.118	IGISAFMN(26.12)SKR	IGISAFMN(1)SKR	8	4823300	0	LOC_Os11g28410	decarboxylase, putative, expressed
A0A0E0HCI9	A0A0E0HCI9;Q5W6W7;B9FNU9;B8AWK7	10;10;10;10	______MGENTGDNPNMSILQRIATSDVPLV	X;X;X;X;X;X;X;X;X;X;X;X;X;X;X;Deamidation 18O (N);X;X;X;X;X;X;X;X;X;X;X;X;X;X;X	XXXXXXXPPPPPPPPPPPPPPPXXXXXXXXX	2	80.245	GEN(-55.39)TGDN(-15.6)PN(15.6)MSILQR	GENTGDN(0.027)PN(0.973)MSILQR	9	4615700	0	LOC_Os05g25310	acyl-CoA synthetase protein, putative, expressed
A0A0P0V814	A0A0P0V814;A0A0E0FT07;Q0JJE3;B9EZM2;B8A9E0	95;104;131;93;105	QLKGSCSSIGASRMKNECMSFRDSCGQGNVE	X;X;X;X;X;X;X;X;X;X;X;X;X;X;X;Deamidation 18O (N);X;X;Oxidation (M);X;X;X;X;X;X;X;X;X;X;X;X	XXXXXXXXXXXXXXXPPPPPPPXXXXXXXXX	3	21.547	N(21.55)ECMSFR	N(1)ECMSFR	1	3673800	0	LOC_Os01g54050	histidine-containing phosphotransfer protein, putative, expressed
Q9XHY2	Q9XHY2	195	VVAQKKREFRALHQGNRTVTEYLHEFDRLAR	X;X;X;X;X;X;X;X;X;X;X;X;X;X;X;Deamidation 18O (N);X;X;X;X;X;X;X;X;X;X;X;X;X;X;X	XXXXXXXXXXPPPPPPPPPPPPPPPPPPXXX	2	59.198	ALHQGN(59.2)RTVTEYLHEFDR	ALHQGN(1)RTVTEYLHEFDR	6	85882000	0	LOC_Os01g14450	retrotransposon protein, putative, Ty3-gypsy subclass, expressed
B8B3L1	B8B3L1	8	________MHEDHYLNKYANKDILIAGEFFH	X;X;X;X;X;X;X;X;X;X;X;X;X;X;X;Deamidation 18O (N);X;X;X;X;X;X;X;X;X;X;X;X;X;X;X	XXXXXXXXXPPPPPPPPPPPPXXXXXXXXXX	2	102.61	HEDHYLN(102.61)KYAN(-102.61)K	HEDHYLN(1)KYANK	7	50732000	0	LOC_Os03g36239	retrotransposon protein, putative, Ty3-gypsy subclass, expressed
B8ARE9	B8ARE9;Q10G10;Q6AVM7;Q0DPZ7;A0A0N7KL01;Q60DJ3;Q259A0	160;536;546;555;555;570;570	WKWFLETLKNDLGIENTYPWTIMTDKQKGLI	X;X;X;X;X;X;X;X;X;X;X;X;X;X;X;Deamidation 18O (N);X;X;X;X;X;X;Oxidation (M);X;X;X;X;X;X;X;X	XXXXXXXXXPPPPPPPPPPPPPPPPPXXXXX	3	23.799	N(-20.08)DLGIEN(20.08)TYPWTIMTDK	N(0.01)DLGIEN(0.99)TYPWTIMTDK	7	35886000	0	LOC_Os03g44590	transposon protein, putative, unclassified, expressed
B9FNP9	B9FNP9;B8AWD5	344;344	KLPDSVCEDLTRISRNFWWGAENRKRKTHWK	X;X;X;X;X;X;X;X;X;X;X;X;X;X;X;Deamidation 18O (N);X;X;X;X;X;X;Deamidation 18O (N);X;X;X;X;X;X;X;X	XPPPPPPPPPPPPPPPPPPPPPPPXXXXXXX	2	19.578	LPDSVCEDLTRISRN(19.58)FWWGAEN(19.58)R	LPDSVCEDLTRISRN(1)FWWGAEN(1)R	15	13779000	0	LOC_Os05g23120	retrotransposon protein, putative, unclassified, expressed
B9FNP9	B9FNP9;B8AWD5	351;351	EDLTRISRNFWWGAENRKRKTHWKSWDCLTK	X;X;X;X;X;X;X;X;Deamidation 18O (N);X;X;X;X;X;X;Deamidation 18O (N);X;X;X;X;X;X;X;X;X;X;X;X;X;X;X	PPPPPPPPPPPPPPPPPXXXXXXXXXXXXXX	2	19.578	LPDSVCEDLTRISRN(19.58)FWWGAEN(19.58)R	LPDSVCEDLTRISRN(1)FWWGAEN(1)R	22	13779000	0	LOC_Os05g23120	retrotransposon protein, putative, unclassified, expressed
Q6K9C6	Q6K9C6;Q7XX89;Q7XRQ0;Q6K7D3	23;122;39;15	EKVFGSARRDYSLFVNIYFTFTNMSNTGDNG	X;X;X;X;X;X;X;X;X;X;X;X;X;X;X;Deamidation 18O (N);X;X;X;X;X;X;X;X;X;X;X;X;X;X;X	XXXXXXXXPPPPPPPPPPPPPPPPPPPPPPP	3	13.702	RDYSLFVN(5.73)IYFTFTN(-5.73)MSN(-5.73)TGDN(-6.89)GN(6.89)TGYK	RDYSLFVN(0.612)IYFTFTN(0.209)MSN(0.209)TGDN(0.216)GN(0.754)TGYK	8	33209000	0	LOC_Os02g54280	retrotransposon protein, putative, unclassified, expressed
Q6K9C6	Q6K9C6;Q7XX89;Q7XRQ0;Q6K7D3	39;138;55;31	IYFTFTNMSNTGDNGNTGYKEKEAPVNTNGG	X;X;X;X;X;X;X;X;X;X;X;X;X;X;X;Deamidation 18O (N);X;X;X;X;X;X;X;X;X;X;X;X;X;X;X	PPPPPPPPPPPPPPPPPPPPXXXXXXXXXXX	3	13.702	RDYSLFVN(5.73)IYFTFTN(-5.73)MSN(-5.73)TGDN(-6.89)GN(6.89)TGYK	RDYSLFVN(0.612)IYFTFTN(0.209)MSN(0.209)TGDN(0.216)GN(0.754)TGYK	24	33209000	0	LOC_Os02g54280	retrotransposon protein, putative, unclassified, expressed
B9FDZ6	B9FDZ6;Q7X6H2	429;591	TEIEKRRKQLAALLENNAESSAIRLATDQLS	X;X;X;X;X;X;X;X;X;X;X;X;X;X;X;Deamidation 18O (N);Deamidation 18O (N);X;X;X;X;X;X;X;X;X;X;X;X;X;X	XXXXXXXXPPPPPPPPPPPPPPPPXXXXXXX	2	38.634	QLAALLEN(38.63)N(38.63)AESSAIR	QLAALLEN(1)N(1)AESSAIR	8	17542000	0	LOC_Os04g10740	retrotransposon protein, putative, unclassified, expressed
B9FDZ6	B9FDZ6;Q7X6H2	430;592	EIEKRRKQLAALLENNAESSAIRLATDQLSE	X;X;X;X;X;X;X;X;X;X;X;X;X;X;Deamidation 18O (N);Deamidation 18O (N);X;X;X;X;X;X;X;X;X;X;X;X;X;X;X	XXXXXXXPPPPPPPPPPPPPPPPXXXXXXXX	2	38.634	QLAALLEN(38.63)N(38.63)AESSAIR	QLAALLEN(1)N(1)AESSAIR	9	17542000	0	LOC_Os04g10740	retrotransposon protein, putative, unclassified, expressed
A0A0E0HTR5	A0A0E0HTR5	15	_MGIRVGRSAMDWGINGGLGRRRQRSCLPPP	X;X;X;X;X;X;X;X;X;X;Oxidation (M);X;X;X;X;Deamidation 18O (N);X;X;X;X;X;X;X;X;X;X;X;X;X;X;X	XXXXXXXXPPPPPPPPPPPPPXXXXXXXXXX	2	42.348	SAMDWGIN(42.35)GGLGR	SAMDWGIN(1)GGLGR	8	29344000	0	LOC_Os06g42180	expressed protein
A0A0P0VU40	A0A0P0VU40;Q10QQ9;A0A0E0G2A8	346;720;722	RHLASGNLQKINQSPNVLNQAMHSERTQDKV	X;X;X;X;X;X;X;X;X;X;X;X;X;X;X;Deamidation 18O (N);X;X;Deamidation 18O (N);X;X;X;X;X;X;X;X;X;X;X;X	XXXXXXXXXXPPPPPPPPPPPPPPPPPPPPX	3	28.083	IN(-28.07)QSPN(28.07)VLN(28.08)QAMHSERTQDK	IN(0.003)QSPN(0.998)VLN(0.998)QAMHSERTQDK	6	38506000	0	LOC_Os03g08820	expressed protein
A0A0P0VU40	A0A0P0VU40;Q10QQ9;A0A0E0G2A8	349;723;725	ASGNLQKINQSPNVLNQAMHSERTQDKVEKS	X;X;X;X;X;X;X;X;X;X;X;X;Deamidation 18O (N);X;X;Deamidation 18O (N);X;X;X;X;X;X;X;X;X;X;X;X;X;X;X	XXXXXXXPPPPPPPPPPPPPPPPPPPPXXXX	3	28.083	IN(-28.07)QSPN(28.07)VLN(28.08)QAMHSERTQDK	IN(0.003)QSPN(0.998)VLN(0.998)QAMHSERTQDK	9	38506000	0	LOC_Os03g08820	expressed protein
A0A0E0GHI0	A0A0E0GHI0;A0A0E0GHI1;A0A0E0GHI3	415;441;482	ENHPKTIAASIMPESNRLAGNKRSRSATRWS	X;X;X;X;X;X;X;X;X;X;X;X;X;X;X;Deamidation 18O (N);X;X;X;X;X;X;X;X;X;X;X;X;X;X;X	XXXXXPPPPPPPPPPPPXXXXXXXXXXXXXX	2	59.35	TIAASIMPESN(59.35)R	TIAASIMPESN(1)R	11	18392000	0	LOC_Os03g07750	expressed protein
A0A0E0GLW8	A0A0E0GLW8;Q10LY7;A0A0N7KH74;A0A0E0GLW6;B8ANY0;A0A0E0GLW5;Q10LY8;A0A0E0GLW3;B7E5B1	157;514;520;585;991;997;1020;1020;1020	EGVNSSRRTFDCPKTNSILSAQSTTGSFNST	X;X;X;X;X;X;X;X;X;X;X;X;X;X;X;Deamidation 18O (N);X;X;X;X;X;X;X;X;X;X;X;X;X;X;X	XXXXXXXXXXXXXXPPPPPPPPPPPPPPPPP	2	28.297	TN(23.75)SILSAQSTTGSFN(-8.97)STN(8.97)SDR	TN(0.996)SILSAQSTTGSFN(0.116)STN(0.888)SDR	2	17475000	0	LOC_Os03g21270	expressed protein
A0A0E0GLW8	A0A0E0GLW8;Q10LY7;A0A0N7KH74;A0A0E0GLW6;B8ANY0;A0A0E0GLW5;Q10LY8;A0A0E0GLW3;B7E5B1	173;530;536;601;1007;1013;1036;1036;1036	SILSAQSTTGSFNSTNSDRLRDRPGAAPSTK	X;X;X;X;X;X;X;X;X;X;X;X;X;X;X;Deamidation 18O (N);X;X;X;X;X;X;X;X;X;X;X;X;X;X;X	PPPPPPPPPPPPPPPPPPPXXXXXXXXXXXX	2	28.297	TN(23.75)SILSAQSTTGSFN(-8.97)STN(8.97)SDR	TN(0.996)SILSAQSTTGSFN(0.116)STN(0.888)SDR	18	17475000	0	LOC_Os03g21270	expressed protein
A0A0P0XZR0	A0A0P0XZR0	38	QRSLQSSLRLTDAVTNNGMSSRKGVAPQKCF	X;X;X;X;X;X;X;X;X;X;X;X;X;X;X;Deamidation 18O (N);Deamidation 18O (N);X;X;X;X;X;X;X;X;X;X;X;X;X;X	XXXXXXXXXPPPPPPPPPPPPPPXXXXXXXX	3	19.496	LTDAVTN(19.5)N(19.5)GMSSRK	LTDAVTN(1)N(1)GMSSRK	7	16836000	0	Os11g0201540	Uncharacterized protein
A0A0P0XZR0	A0A0P0XZR0	39	RSLQSSLRLTDAVTNNGMSSRKGVAPQKCFS	X;X;X;X;X;X;X;X;X;X;X;X;X;X;Deamidation 18O (N);Deamidation 18O (N);X;X;X;X;X;X;X;X;X;X;X;X;X;X;X	XXXXXXXXPPPPPPPPPPPPPPXXXXXXXXX	3	19.496	LTDAVTN(19.5)N(19.5)GMSSRK	LTDAVTN(1)N(1)GMSSRK	8	16836000	0	Os11g0201540	Uncharacterized protein
A2XK73	A2XK73;A0A0E0GR68;Q84ST1	114;125;122	KLHIGSYANQIRVKMNVSQSMPEKFHWKIEI	X;X;X;X;X;X;X;X;X;X;X;X;X;X;X;Deamidation 18O (N);X;X;X;X;Oxidation (M);X;X;X;X;X;X;X;X;X;X	XXXXXXXXXXXXXXPPPPPPPPPPXXXXXXX	2	153.24	MN(53.33)VSQSMPEK	MN(1)VSQSMPEK	2	15952000	0	LOC_Os03g45180	expressed protein
B9F1U2	B9F1U2;A0A0E0GBE6;A2X8C2	138;138;138	NAGDTYWIVSTTKLQNLTQYQAVERVNPTLV	X;X;X;X;X;X;X;X;X;X;X;X;X;X;X;Deamidation 18O (N);X;X;X;X;X;X;X;X;X;X;X;X;X;X;X	XXXXXXXXXXXXXPPPPPPPPPPPPXXXXXX	2	143.96	LQN(143.96)LTQYQAVER	LQN(1)LTQYQAVER	3	13692000	0	LOC_Os05g38020	expressed protein
Q5JMH9	Q5JMH9	6	__________MDGRDNLCLVDKIVPLFNFSA	X;X;X;X;X;X;X;X;X;X;X;X;X;X;X;Deamidation 18O (N);X;X;X;X;X;X;X;X;X;X;X;X;X;X;X	XXXXXXXXXXXPPPPPPPPPPPXXXXXXXXX	2	22.086	DGRDN(22.09)LCLVDK	DGRDN(1)LCLVDK	5	13431000	0	BAD87157.1	Uncharacterized protein
A0A0E0JBP7	A0A0E0JBP7;A0A0E0JBP9;A0A0E0JBP6;Q2QYY0;Q0IQS6;A0A0E0JBP8;B9GBD6;B8BLS5	15;15;15;15;15;15;15;15	_MASPCRIPAATGSGNKENNISQNRRHVLDC	X;X;X;X;X;X;X;X;X;X;X;X;X;X;X;Deamidation 18O (N);X;X;Deamidation 18O (N);Deamidation 18O (N);X;X;X;Deamidation 18O (N);X;X;X;X;X;X;X	XXXXXXXPPPPPPPPPPPPPPPPPPPXXXXX	3	20.091	IPAATGSGN(20.09)KEN(20.09)N(20.09)ISQN(20.09)RR	IPAATGSGN(1)KEN(1)N(1)ISQN(1)RR	9	7651200	0	LOC_Os12g01220	expressed protein
A0A0E0JBP7	A0A0E0JBP7;A0A0E0JBP9;A0A0E0JBP6;Q2QYY0;Q0IQS6;A0A0E0JBP8;B9GBD6;B8BLS5	18;18;18;18;18;18;18;18	SPCRIPAATGSGNKENNISQNRRHVLDCQTP	X;X;X;X;X;X;X;X;X;X;X;X;Deamidation 18O (N);X;X;Deamidation 18O (N);Deamidation 18O (N);X;X;X;Deamidation 18O (N);X;X;X;X;X;X;X;X;X;X	XXXXPPPPPPPPPPPPPPPPPPPXXXXXXXX	3	20.091	IPAATGSGN(20.09)KEN(20.09)N(20.09)ISQN(20.09)RR	IPAATGSGN(1)KEN(1)N(1)ISQN(1)RR	12	7651200	0	LOC_Os12g01220	expressed protein
A0A0E0JBP7	A0A0E0JBP7;A0A0E0JBP9;A0A0E0JBP6;Q2QYY0;Q0IQS6;A0A0E0JBP8;B9GBD6;B8BLS5	19;19;19;19;19;19;19;19	PCRIPAATGSGNKENNISQNRRHVLDCQTPC	X;X;X;X;X;X;X;X;X;X;X;Deamidation 18O (N);X;X;Deamidation 18O (N);Deamidation 18O (N);X;X;X;Deamidation 18O (N);X;X;X;X;X;X;X;X;X;X;X	XXXPPPPPPPPPPPPPPPPPPPXXXXXXXXX	3	20.091	IPAATGSGN(20.09)KEN(20.09)N(20.09)ISQN(20.09)RR	IPAATGSGN(1)KEN(1)N(1)ISQN(1)RR	13	7651200	0	LOC_Os12g01220	expressed protein
A0A0E0JBP7	A0A0E0JBP7;A0A0E0JBP9;A0A0E0JBP6;Q2QYY0;Q0IQS6;A0A0E0JBP8;B9GBD6;B8BLS5	23;23;23;23;23;23;23;23	PAATGSGNKENNISQNRRHVLDCQTPCEGKG	X;X;X;X;X;X;X;Deamidation 18O (N);X;X;Deamidation 18O (N);Deamidation 18O (N);X;X;X;Deamidation 18O (N);X;X;X;X;X;X;X;X;X;X;X;X;X;X;X	PPPPPPPPPPPPPPPPPPXXXXXXXXXXXXX	3	20.091	IPAATGSGN(20.09)KEN(20.09)N(20.09)ISQN(20.09)RR	IPAATGSGN(1)KEN(1)N(1)ISQN(1)RR	17	7651200	0	LOC_Os12g01220	expressed protein
Q6Z3A7	Q6Z3A7;A0A0P0X5U3;B9FX33;B8B5S4;A0A0E0I074;A0A0E0I071;A0A0E0I073;A0A0E0I072	19;29;80;80;171;171;174;174	RMAAGKQKKRIIRSTNSDQNRTWKKSKVESS	X;X;X;X;X;X;X;X;X;X;X;X;X;X;X;Deamidation 18O (N);X;X;X;Deamidation 18O (N);X;X;X;X;X;X;X;X;X;X;X	XXXXXXXXXXPPPPPPPPPPPXXXXXXXXXX	2	40.002	IIRSTN(40)SDQN(40)R	IIRSTN(1)SDQN(1)R	6	7134000	0	LOC_Os07g27760	expressed protein
Q6Z3A7	Q6Z3A7;A0A0P0X5U3;B9FX33;B8B5S4;A0A0E0I074;A0A0E0I071;A0A0E0I073;A0A0E0I072	23;33;84;84;175;175;178;178	GKQKKRIIRSTNSDQNRTWKKSKVESSNCHI	X;X;X;X;X;X;X;X;X;X;X;Deamidation 18O (N);X;X;X;Deamidation 18O (N);X;X;X;X;X;X;X;X;X;X;X;X;X;X;X	XXXXXXPPPPPPPPPPPXXXXXXXXXXXXXX	2	40.002	IIRSTN(40)SDQN(40)R	IIRSTN(1)SDQN(1)R	10	7134000	0	LOC_Os07g27760	expressed protein
A0A0E0IE02	A0A0E0IE02	229	FDRVAMHPKLPQEAKNKDQGLCSSNGPREHQ	X;X;X;X;X;X;X;X;X;X;X;X;X;X;X;Deamidation 18O (N);X;X;X;X;X;X;X;X;Deamidation 18O (N);X;X;X;X;X;X	XXXXXXXXXPPPPPPPPPPPPPPPPPPPXXX	3	22.874	LPQEAKN(22.87)KDQGLCSSN(22.87)GPR	LPQEAKN(1)KDQGLCSSN(1)GPR	7	7116700	0	LOC_Os08g39280	expressed protein
A0A0E0IE02	A0A0E0IE02	238	LPQEAKNKDQGLCSSNGPREHQNLEH_____	X;X;X;X;X;X;Deamidation 18O (N);X;X;X;X;X;X;X;X;Deamidation 18O (N);X;X;X;X;X;X;X;X;X;X;X;X;X;X;X	PPPPPPPPPPPPPPPPPPPXXXXXXXXXXXX	3	22.874	LPQEAKN(22.87)KDQGLCSSN(22.87)GPR	LPQEAKN(1)KDQGLCSSN(1)GPR	16	7116700	0	LOC_Os08g39280	expressed protein
A0A0E0FN40	A0A0E0FN40	13	___MKAATGVAADEVNRRASGGGRREAGDRV	X;X;X;X;X;X;X;X;X;X;X;X;X;X;X;Deamidation 18O (N);X;X;X;X;X;X;X;X;X;X;X;X;X;X;X	XXXPPPPPPPPPPPPPPXXXXXXXXXXXXXX	2	23.605	MKAATGVAADEVN(23.6)R	MKAATGVAADEVN(1)R	13	6768400	0	LOC_Os01g37530	expressed protein
A0A0P0WS34	A0A0P0WS34;A0A0E0GWD4;B8B2C5;B9FRF3;Q5VSC5	75;346;451;565;586	TKADLPKKSRKEDLENVAGMGSATASGGKFD	X;X;X;X;X;X;X;X;X;X;X;X;X;X;X;Deamidation 18O (N);X;X;X;Oxidation (M);X;X;X;X;X;X;X;X;X;X;X	XXXXXXXXXXXPPPPPPPPPPPPPPPPPPXX	2	35.645	EDLEN(35.65)VAGMGSATASGGK	EDLEN(1)VAGMGSATASGGK	5	190370000	0	LOC_Os06g04970	expressed protein
A2Z326	A2Z326;A0A0P0XP74;B9G4J2;Q69IN2	46;46;46;46	LFGNTAAAAPAADSYNPKNKRGLRIQIERIR	X;X;X;X;X;X;X;X;X;X;X;X;X;X;X;Deamidation 18O (N);X;X;Deamidation 18O (N);X;X;X;X;X;X;X;X;X;X;X;X	PPPPPPPPPPPPPPPPPPPPXXXXXXXXXXX	3	25.888	HLFGN(-22.96)TAAAAPAADSYN(22.96)PKN(22.96)K	HLFGN(0.01)TAAAAPAADSYN(0.995)PKN(0.995)K	17	188480000	0	LOC_Os09g33890	expressed protein
A2Z326	A2Z326;A0A0P0XP74;B9G4J2;Q69IN2	49;49;49;49	NTAAAAPAADSYNPKNKRGLRIQIERIRFPR	X;X;X;X;X;X;X;X;X;X;X;X;Deamidation 18O (N);X;X;Deamidation 18O (N);X;X;X;X;X;X;X;X;X;X;X;X;X;X;X	PPPPPPPPPPPPPPPPPXXXXXXXXXXXXXX	3	25.888	HLFGN(-22.96)TAAAAPAADSYN(22.96)PKN(22.96)K	HLFGN(0.01)TAAAAPAADSYN(0.995)PKN(0.995)K	20	188480000	0	LOC_Os09g33890	expressed protein
A0A0E0I0A2	A0A0E0I0A2;Q69RG8;B8B5X1	299;303;315	VRSFGGEKRQISMFDNLALAFQNSGTKLGVL	X;X;X;X;X;X;X;X;X;X;X;X;Oxidation (M);X;X;Deamidation 18O (N);X;X;X;X;X;X;Deamidation 18O (N);X;X;X;X;X;X;X;X	XXXXXXXXPPPPPPPPPPPPPPPPPPPXXXX	3	35.737	RQISMFDN(18.54)LALAFQN(18.54)SGTK	RQISMFDN(1)LALAFQN(1)SGTK	8	681010000	60434000	LOC_Os07g28090	ABC transporter, ATP-binding protein, putative, expressed
A0A0E0I0A2	A0A0E0I0A2;Q69RG8;B8B5X1	306;310;322	KRQISMFDNLALAFQNSGTKLGVLKSANESL	X;X;X;X;X;Oxidation (M);X;X;Deamidation 18O (N);X;X;X;X;X;X;Deamidation 18O (N);X;X;X;X;X;X;X;X;X;X;X;X;X;X;X	XPPPPPPPPPPPPPPPPPPPXXXXXXXXXXX	3	35.737	RQISMFDN(18.54)LALAFQN(18.54)SGTK	RQISMFDN(1)LALAFQN(1)SGTK	15	681010000	60434000	LOC_Os07g28090	ABC transporter, ATP-binding protein, putative, expressed
Q7XQ12	Q7XQ12;Q01HF3;A2XVF3;A0A0E0H317	18;18;18;18	TCAADLAPLLGPVAANATDYLCNRFADTTSA	X;X;X;X;X;X;X;X;X;X;X;X;X;X;X;Deamidation 18O (N);X;X;X;X;X;X;X;X;X;X;X;X;X;X;X	PPPPPPPPPPPPPPPPPPPPPPPPXXXXXXX	3	118.22	ATCAADLAPLLGPVAAN(36.91)ATDYLCN(-36.91)R	ATCAADLAPLLGPVAAN(1)ATDYLCNR	17	16933000	19279000	LOC_Os04g43070	ammonium transporter protein, putative, expressed
A0A0E0GK56	A0A0E0GK56;Q7X923;B9FEF3;A0A0E0GZ69;B9FEG0	381;381;381;381;337	SAGTGIGLEFRESGLNLNPKNDRIIKAGMVF	X;X;X;X;X;X;X;X;X;X;X;X;X;X;X;Deamidation 18O (N);X;Deamidation 18O (N);X;X;X;X;X;X;X;X;X;X;X;X;X	XXXXXXXXXXXPPPPPPPPPXXXXXXXXXXX	2	83.614	ESGLN(83.61)LN(83.61)PK	ESGLN(1)LN(1)PK	5	589160000	177590000	LOC_Os04g25550	FACT complex subunit SPT16, putative, expressed
A0A0E0GK56	A0A0E0GK56;Q7X923;B9FEF3;A0A0E0GZ69;B9FEG0	383;383;383;383;339	GTGIGLEFRESGLNLNPKNDRIIKAGMVFNV	X;X;X;X;X;X;X;X;X;X;X;X;X;Deamidation 18O (N);X;Deamidation 18O (N);X;X;X;X;X;X;X;X;X;X;X;X;X;X;X	XXXXXXXXXPPPPPPPPPXXXXXXXXXXXXX	2	83.614	ESGLN(83.61)LN(83.61)PK	ESGLN(1)LN(1)PK	7	589160000	177590000	LOC_Os04g25550	FACT complex subunit SPT16, putative, expressed
A2WLG2	A2WLG2;A2ZQ19;A0A0E0FH93	276;278;304	GARVAAVKEAKPQGSNKRGATTNSSVANGVE	X;X;X;X;X;X;X;X;X;X;X;X;X;X;X;Deamidation 18O (N);X;X;X;X;X;X;X;X;X;X;X;X;X;X;X	XXXXXXXXXXXPPPPPPPXXXXXXXXXXXXX	2	117.62	PQGSN(114.02)KR	PQGSN(1)KR	5	202900000	33806000	LOC_Os01g08820	PHD-finger domain containing protein, putative, expressed
Q94CS6	Q94CS6;A2WZN8;A0A0E0FZM5;A0A0A0VHK4;A0A0A0VHJ3;A0A0A0VHI7;A0A0A0VHI3;A0A0A0VCH5;A0A0A0VCG8	373;373;373;373;373;373;373;373;373	LFRSKRLDSEIFFAPNSNSI___________	X;X;X;X;X;X;X;X;X;X;X;X;X;X;X;Deamidation 18O (N);X;Deamidation 18O (N);X;X;X;X;X;X;X;X;X;X;X;X;X	XXXXXXPPPPPPPPPPPPPPXXXXXXXXXXX	2	85.731	LDSEIFFAPN(42.39)SN(42.39)SI	LDSEIFFAPN(1)SN(1)SI	10	40593000	7134300	LOC_Os01g74480	cupin domain containing protein, expressed
Q94CS6	Q94CS6;A2WZN8;A0A0E0FZM5;A0A0A0VHK4;A0A0A0VHJ3;A0A0A0VHI7;A0A0A0VHI3;A0A0A0VCH5;A0A0A0VCG8	375;375;375;375;375;375;375;375;375	RSKRLDSEIFFAPNSNSI_____________	X;X;X;X;X;X;X;X;X;X;X;X;X;Deamidation 18O (N);X;Deamidation 18O (N);X;X;X;X;X;X;X;X;X;X;X;X;X;X;X	XXXXPPPPPPPPPPPPPPXXXXXXXXXXXXX	2	85.731	LDSEIFFAPN(42.39)SN(42.39)SI	LDSEIFFAPN(1)SN(1)SI	12	40593000	7134300	LOC_Os01g74480	cupin domain containing protein, expressed
Q9SLY8	Q9SLY8;B9FWE4;Q0D7H6;B8B4R4;A0A0E0HYR3;B7EW55	25;61;61;61;65;61	VKSEWKKDENMAGEWNHTSGKWNGDPEDKGI	X;X;X;X;X;X;X;X;X;X;Oxidation (M);X;X;X;X;Deamidation 18O (N);X;X;X;X;X;X;X;X;X;X;X;X;X;X;X	XXXXXXXPPPPPPPPPPPPPPXXXXXXXXXX	2	237.87	DEN(-158.67)MAGEWN(158.67)HTSGK	DENMAGEWN(1)HTSGK	9	27571000	6901500	LOC_Os07g14270	calreticulin precursor protein, putative, expressed
B9ETB8	B9ETB8;A0A0P0V8V5;Q0JIT3;Q5ZCF0;B8AAE8	9;9;9;9;9	_______MSAAAAASNVEFIRSRSDKREYRR	X;X;X;X;X;X;X;X;X;X;X;X;X;X;X;Deamidation 18O (N);X;X;X;X;X;X;X;X;X;X;X;X;X;X;X	XXXXXXXXPPPPPPPPPPPPPPPXXXXXXXX	2	33.229	SAAAAASN(33.23)VEFIRSR	SAAAAASN(1)VEFIRSR	8	21785000	8659500	LOC_Os01g57073	insulin-degrading enzyme, putative, expressed
H2KWV8	H2KWV8;A0A0P0W1Y6;B8AP37;Q10FE5;O24187;O22390;B7SDF0;A2ZN20;A0A0E0J916;Q6ASX7;Q2QLR2;A0A0E0GRM3;A0A0P0W1U8;Q8VXC4;Q10FE7;O22385;O22384	70;70;70;70;70;70;70;70;70;70;70;70;70;70;70;70;70	TFSSEQAMRDAIEGMNGKELDGRNITVNEAQ	X;X;X;X;X;X;X;X;X;X;X;X;X;X;Oxidation (M);Deamidation 18O (N);X;X;X;X;X;X;X;Deamidation 18O (N);X;X;X;X;X;X;X	XXXXXXXXXPPPPPPPPPPPPPPXXXXXXXX	3	39.005	DAIEGMN(39)GKELDGR	DAIEGMN(1)GKELDGR	7	15894000	3116300	LOC_Os12g43600	RNA recognition motif containing protein, expressed
A0A0E0IKE4	A0A0E0IKE4;B9G3V3;A0A0E0IKE2;Q0J1G2;P25778;B8BCF6;A6N1F3;A0A0P0XNI7;A0A0E0IKE3	182;210;259;258;258;259;263;267;284	HYKPENVGVKVLDSVNITLGAEDELKNAVGL	X;X;X;X;X;X;X;X;X;X;X;X;X;X;X;Deamidation 18O (N);X;X;X;X;X;X;X;X;X;X;X;X;X;X;X	XXXXXXXXXXPPPPPPPPPPPPPPPPXXXXX	2	111.39	VLDSVN(74.46)ITLGAEDELK	VLDSVN(1)ITLGAEDELK	6	5982800	3641100	LOC_Os09g27030	oryzain gamma chain precursor, putative, expressed
Q338Z4	Q338Z4	11	_____MLTVAASALRNNKKSTAAACFSLAMP	X;X;X;X;X;X;X;X;X;X;X;X;X;X;X;Deamidation 18O (N);X;X;X;X;X;X;X;X;X;X;X;X;X;X;X	XXXXXPPPPPPPPPPPPPXXXXXXXXXXXXX	2	64.485	MLTVAASALRN(0)N(0)K	MLTVAASALRN(0.5)N(0.5)K	11	30476000	41934000	LOC_Os10g23120	pyridoxamine 5'-phosphate oxidase family protein, putative, expressed
Q338Z4	Q338Z4	12	____MLTVAASALRNNKKSTAAACFSLAMPF	X;X;X;X;X;X;X;X;X;X;X;X;X;X;X;X;X;X;X;X;X;X;X;X;X;X;X;X;X;X;X	XXXXXXXXXXXXXXXXXXXXXXXXXXXXXXX	2	64.485	MLTVAASALRN(0)N(0)K	MLTVAASALRN(0.5)N(0.5)K	12	30476000	41934000	LOC_Os10g23120	pyridoxamine 5'-phosphate oxidase family protein, putative, expressed
Q6EQI7	Q6EQI7	279	DKLTSEQKAEYEQMMNNLHN___________	X;X;X;X;X;X;X;X;X;X;X;X;X;Oxidation (M);Oxidation (M);Deamidation 18O (N);Deamidation 18O (N);X;X;X;X;X;X;X;X;X;X;X;X;X;X	XXXXXXXXPPPPPPPPPPPPXXXXXXXXXXX	2	11.164	AEYEQMMN(11.16)N(11.16)LHN(-11.16)	AEYEQMMN(0.934)N(0.934)LHN(0.133)	8	222690000	32189000	LOC_Os04g19280	retrotransposon protein, putative, unclassified, expressed
Q6EQI7	Q6EQI7	280	KLTSEQKAEYEQMMNNLHN____________	X;X;X;X;X;X;X;X;X;X;X;X;Oxidation (M);Oxidation (M);Deamidation 18O (N);Deamidation 18O (N);X;X;X;X;X;X;X;X;X;X;X;X;X;X;X	XXXXXXXPPPPPPPPPPPPXXXXXXXXXXXX	2	11.164	AEYEQMMN(11.16)N(11.16)LHN(-11.16)	AEYEQMMN(0.934)N(0.934)LHN(0.133)	9	222690000	32189000	LOC_Os04g19280	retrotransposon protein, putative, unclassified, expressed
A0A0P0XTD1	A0A0P0XTD1;B9G5B3;Q7XFG3;Q8S6H9	65;30;126;126	QRNEGCKEEKTKATANDISNPNGKLAILLVD	X;X;X;X;X;X;X;X;X;X;X;X;X;X;X;Deamidation 18O (N);X;X;X;Deamidation 18O (N);X;Deamidation 18O (N);X;X;X;X;X;X;X;X;X	XXXXXXXXXXXXPPPPPPPPPPPPXXXXXXX	2	60.436	ATAN(60.44)DISN(60.44)PN(60.44)GK	ATAN(1)DISN(1)PN(1)GK	4	215010000	75397000	LOC_Os10g21070	retrotransposon protein, putative, unclassified, expressed
A0A0P0XTD1	A0A0P0XTD1;B9G5B3;Q7XFG3;Q8S6H9	69;34;130;130	GCKEEKTKATANDISNPNGKLAILLVDFRVG	X;X;X;X;X;X;X;X;X;X;X;Deamidation 18O (N);X;X;X;Deamidation 18O (N);X;Deamidation 18O (N);X;X;X;X;X;X;X;X;X;X;X;X;X	XXXXXXXXPPPPPPPPPPPPXXXXXXXXXXX	2	60.436	ATAN(60.44)DISN(60.44)PN(60.44)GK	ATAN(1)DISN(1)PN(1)GK	8	215010000	75397000	LOC_Os10g21070	retrotransposon protein, putative, unclassified, expressed
A0A0P0XTD1	A0A0P0XTD1;B9G5B3;Q7XFG3;Q8S6H9	71;36;132;132	KEEKTKATANDISNPNGKLAILLVDFRVGNL	X;X;X;X;X;X;X;X;X;Deamidation 18O (N);X;X;X;Deamidation 18O (N);X;Deamidation 18O (N);X;X;X;X;X;X;X;X;X;X;X;X;X;X;X	XXXXXXPPPPPPPPPPPPXXXXXXXXXXXXX	2	60.436	ATAN(60.44)DISN(60.44)PN(60.44)GK	ATAN(1)DISN(1)PN(1)GK	10	215010000	75397000	LOC_Os10g21070	retrotransposon protein, putative, unclassified, expressed
Q65WV0	Q65WV0	563	TLKKANAENKALSGDNKSLHADLEAANKRDA	X;X;X;X;X;X;X;X;X;X;X;X;X;X;X;Deamidation 18O (N);X;X;X;X;X;X;X;X;X;X;X;X;X;X;X	XXXXPPPPPPPPPPPPPXXXXXXXXXXXXXX	1	26.442	AN(-26.44)AEN(-26.44)KALSGDN(26.44)K	AN(0.002)AEN(0.002)KALSGDN(0.995)K	12	53892000	2071400	LOC_Os05g08040	retrotransposon protein, putative, unclassified, expressed
B9FF08	B9FF08;Q0JDG3;Q7XLY7;Q01L40;A2XT37;A0A0E0H0B7	122;288;384;384;384;384	KSIMAAPHNRGGVSGNGGMAMAAVATS____	X;X;X;X;X;X;X;X;X;X;X;X;X;X;X;Deamidation 18O (N);X;X;Oxidation (M);X;Oxidation (M);X;X;X;X;X;X;X;X;X;X	XXXXXXXXXXPPPPPPPPPPPPPPPPPXXXX	2	22.879	GGVSGN(22.88)GGMAMAAVATS	GGVSGN(1)GGMAMAAVATS	6	5608600	20262000	LOC_Os04g33260	expressed protein
Q0DN50	Q0DN50	65	LEVVDDDVEKFLSDLNLAMADMKKERDALAK	X;X;X;X;X;X;X;X;X;X;X;X;X;X;X;Deamidation 18O (N);X;X;Oxidation (M);X;X;Oxidation (M);X;X;X;X;X;X;X;X;X	XXXXXXXXXXPPPPPPPPPPPPPXXXXXXXX	2	62.823	FLSDLN(62.82)LAMADMK	FLSDLN(1)LAMADMK	6	52073000	84684000	LOC_Os03g56340	expressed protein
A0A0P0XJX5	A0A0P0XJX5	9	_______MLAGVVMPNKSSSNSSRTSSSSSP	X;X;X;X;X;X;X;Oxidation (M);X;X;X;X;X;X;X;Deamidation 18O (N);X;X;X;X;Deamidation 18O (N);X;X;X;X;X;X;X;X;X;X	XXXXXXXPPPPPPPPPPPPPPPPPXXXXXXX	2	24.343	MLAGVVMPN(22.88)KSSSN(22.88)SSR	MLAGVVMPN(1)KSSSN(1)SSR	9	28979000	63718000	Os09g0317500	Uncharacterized protein
A0A0P0XJX5	A0A0P0XJX5	14	__MLAGVVMPNKSSSNSSRTSSSSSPGGGVA	X;X;Oxidation (M);X;X;X;X;X;X;X;Deamidation 18O (N);X;X;X;X;Deamidation 18O (N);X;X;X;X;X;X;X;X;X;X;X;X;X;X;X	XXPPPPPPPPPPPPPPPPPXXXXXXXXXXXX	2	24.343	MLAGVVMPN(22.88)KSSSN(22.88)SSR	MLAGVVMPN(1)KSSSN(1)SSR	14	28979000	63718000	Os09g0317500	Uncharacterized protein
A0A0E0HTG5	A0A0E0HTG5;A2YF04	334;544	YLPNKRIAVGELQHCNLSYNIAVVNVKGFCC	X;X;X;X;X;X;X;X;X;X;X;X;X;X;X;Deamidation 18O (N);X;X;X;Deamidation 18O (N);X;X;X;X;X;X;X;X;X;X;X	XXXXXXPPPPPPPPPPPPPPPPPPPPPXXXX	2	81.676	IAVGELQHCN(0)LSYN(0)IAVVN(0)VK	IAVGELQHCN(0.667)LSYN(0.667)IAVVN(0.667)VK	10	74234000	135760000	A0A0E0HTG5	expressed protein
A0A0E0HTG5	A0A0E0HTG5;A2YF04	338;548	KRIAVGELQHCNLSYNIAVVNVKGFCCLRTA	X;X;X;X;X;X;X;X;X;X;X;Deamidation 18O (N);X;X;X;Deamidation 18O (N);X;X;X;X;X;X;X;X;X;X;X;X;X;X;X	XXPPPPPPPPPPPPPPPPPPPPPXXXXXXXX	2	81.676	IAVGELQHCN(0)LSYN(0)IAVVN(0)VK	IAVGELQHCN(0.667)LSYN(0.667)IAVVN(0.667)VK	14	74234000	135760000	A0A0E0HTG5	expressed protein
A0A0E0HTG5	A0A0E0HTG5;A2YF04	343;553	GELQHCNLSYNIAVVNVKGFCCLRTAELDKQ	X;X;X;X;X;X;X;X;X;X;X;X;X;X;X;X;X;X;X;X;X;X;X;X;X;X;X;X;X;X;X	XXXXXXXXXXXXXXXXXXXXXXXXXXXXXXX	2	81.676	IAVGELQHCN(0)LSYN(0)IAVVN(0)VK	IAVGELQHCN(0.667)LSYN(0.667)IAVVN(0.667)VK	19	74234000	135760000	A0A0E0HTG5	expressed protein

## Sheet: Sites
Identified N-glycosysites from WT and mld1
Sites of mld1	Sites of WT
	______________MNRNNIHDPNFFRCQCS
	____________MNRNNIHDPNFFRCQCSSK
	___________MNRNNIHDPNFFRCQCSSKS
	______MNRNNIHDPNFFRCQCSSKSARKHC
	EMDMIVQWLIKPLDGNAETQVSSTSPMHVPV
	QIPRFLGNISMLSYLNLSFNNFSGEVPDFGV
	DFGVFTNITAFLIQGNDKLCGGIPTLHLRPC
	VTRLRRLRYLNMGDVNLSMADYRTSASRFAR
	GATSFPQPILTAASFNASLFRAIGEERMCVN
	___________MMMINTQCNRPSACATAPTE
	_______MMMINTQCNRPSACATAPTETTCR
	DLDSLSFHQGGLLMANKKCELPPGSFRTPHK
	FSVEECEDLRLIIQSNIYNYLGILLEGRERF
	EECEDLRLIIQSNIYNYLGILLEGRERFEEE
	LQIGVPVRRDFKTFVNVETNPNTNRSTVSGY
	VPVRRDFKTFVNVETNPNTNRSTVSGYSIDM
	VRRDFKTFVNVETNPNTNRSTVSGYSIDMFE
	RDFKTFVNVETNPNTNRSTVSGYSIDMFEAA
	AEAAARAKESAQDIINLKPLIEKKQWPFVRD
	NRGNIPTIFLHSVLPNLLENPEFQNRRNPGR
	YECLRGGLDFTKDDENVNSQPFMRWRDRFVF
	CLRGGLDFTKDDENVNSQPFMRWRDRFVFCA
	DAPNNFTYSTKLDNGNHMVSANKMCVCKCTS
	TYSTKLDNGNHMVSANKMCVCKCTSSCLGED
	RVMYNEAIPLTGKTANNTEPFNRTSESSSKL
	AIPLTGKTANNTEPFNRTSESSSKLPDSKPA
	_________MLDATFNAKLGDFGLARLVDHG
	VFATQLYSHVRDLWINKL_____________
	HVEAVLAKKCGPHEDNFGLVEPRVGIGCDRC
	__METVSEASMGHGMNYALKRSIEDSGNQIS
	NASLQKEEKVNDSSKNAENADNPIEKTVAPK
	LQKEEKVNDSSKNAENADNPIEKTVAPKGQE
	______MASMKLVADNGATSTTKIPTTDYSK
	KQLPCVSLSSSMMEENQSVTHGNQQSINVDW
	LSSSMMEENQSVTHGNQQSINVDWNKVKLDW
	__________MPQHKNAEPMVSRDGHAALAV
	_________MAGLTKNRSTSACRLCFILLLV
	________MALSFLPNFGNYKRNPAKILVSY
DSLGNLLKLRFLRLNNNSLSGSIPKSLTAIT
QSPPRQPSTRNPRNRNRNPPIGSNGDNGGNG
PPRQPSTRNPRNRNRNPPIGSNGDNGGNGDG
TRNPRNRNRNPPIGSNGDNGGNGDGSGGDGG
RNRNPPIGSNGDNGGNGDGSGGDGGGRSSKI
SIPASIRLLVKLNSLNLSSNRISGVIPPASF
KDYYAVEEVKRVERYNLDVDECISSNPRQID
RVERYNLDVDECISSNPRQIDEIDDDISPVL
NIPVTFGDLKSLGVLNLSHNSLSGTIPTTLN
EGVIPPELSYLKQLINLSLSENKLTGEIPGT
TNLQELRLGMVDMSSNGARWCDAIARFSPKL
SIPPSIKSLTSLTSLNLSRNQISGEIPAAVG
PRWPHRKMKSLQTLINNVQVLQEASKANNEE
RWPHRKMKSLQTLINNVQVLQEASKANNEEQ
NHAIKIGHESDLFVGNALMDFYAKCNDMDSS
DLFVGNALMDFYAKCNDMDSSLKIFSSLRDA
AIVSWVNKKLAPGVQNITTVDEAEKILTGED
LQDFLFESDDGRRYINLTFGCPLLDTVVDDL
THERKTIDLEQGTIYNMCTQKPPHDYSQQLY
SKEMGISVGIKHKKINVSNPRVAWEHEQFSR
PTKAIYESAKIFLFNNATNVRVTAKSLKIWE
FFDPVKHRRILLGWANESDSVTYDKAKGWAG
DKSPYYKLKAVLPDSNVTVASQKKIEDKLNV
KTGLFSGHGKSIGHINNPVYSSDIHNEVGRF
TGLFSGHGKSIGHINNPVYSSDIHNEVGRFT
SIGHINNPVYSSDIHNEVGRFTSVEKLVNKP
AEIKSTPSTKRKKHCNCKNSQCLKLQEAITV
KSTPSTKRKKHCNCKNSQCLKLQEAITVRSN
LLNGPTLLVDTPRNTNITAKAMESLNIPKGV
RVTSPAGATRCVDAANDLARGFNSGLRSAMA
KNDTESRFESLVNGGNCSREALNGTSINGKV
ASRYGADVGLRQRGLNISDDDYDSPRDYYGH
VPARWKGVCQTGDAFNTTNCNRKIIGARWYS
FQVINDTQIKYGIQTNSTPVARRGTYEDPTF
AAAATATSNPRLRVRNPDPNPPRPNYSRRRF
TATSNPRLRVRNPDPNPPRPNYSRRRFFYPG
PRLRVRNPDPNPPRPNYSRRRFFYPGARCGH
___________MIGHNNDEFDDQSISNTETT
__________MIGHNNDEFDDQSISNTETTK
YNEQIHDLLGNSGLENRSVGATALNERSSRS
____MLHLASISAQPNPWCKKQCGDVKIPYP
RRLLHDDGRGVAEALNETTCFDNQCEGLVIQ
GIFKSDQGLIEDAQTNRTAVRFALNQAAFFD
QQQQVKEEEEEAAVENLPPPPQEEEQRRERK
LVTTAPLLRVSGEVANLCNALRAVSLRGAGI
TAPLLRVSGEVANLCNALRAVSLRGAGICNR
TRDGAGICLPDIRMDNCTNIANVYPKGKKTY
GYSKQTAQKVMIQSTNSSVLVKFKEQTKYNL
IEFRDAVKGNNIAHSNTSCRDIWTEYHELGW
EPPKDSAKMETDDAPNEAASGTDVNMQEAKA
ETDDAPNEAASGTDVNMQEAKAPADAAADGA
________MASMEPLNRMVRMVARAFYDDVS
LGCSKMQSLKPGKYINKPSGNANTKCRGAVT
TDLPAPSSSLAELIGNFSRKGLDATDMVALS
TEPSAPKAAAAAPVENSADKGPHQDSQPPSA
_______MDMALPIVNATAAVLARVSAAFNA
_____MLSGLDDGLENRRGGSDWGWRGGFRN
____________MRRNTVLNLGVEEGGNHGY
________MRRNTVLNLGVEEGGNHGYRSGE
MRRNTVLNLGVEEGGNHGYRSGEGMTQLSPL
______________INNTNLEFFPVKNKAEI
_____________INNTNLEFFPVKNKAEIF
___INNTNLEFFPVKNKAEIFRLRGDFLLKM
ADVAPGIIRFVVGSTNASWQTNDHSGAASHD
VAFGCGLFNNGVFKSNETGIAGFGRGPLSLP
DEDDCYDLLGVKQDANVSEIKKAYYKLSLKH
STIAAVEGINAIRTSNLTALSEQQLVDCDTK
DELSEWIKTSSAESGNVSRALCEDISKHCQS
ILGWLSRTRPDIDGLNGTQSNRLNASDPSSP
ISVSGHKKIGISAFMNSKRTIVVFERPKDEV
______MGENTGDNPNMSILQRIATSDVPLV
QLKGSCSSIGASRMKNECMSFRDSCGQGNVE
VVAQKKREFRALHQGNRTVTEYLHEFDRLAR
________MHEDHYLNKYANKDILIAGEFFH
WKWFLETLKNDLGIENTYPWTIMTDKQKGLI
KLPDSVCEDLTRISRNFWWGAENRKRKTHWK
EDLTRISRNFWWGAENRKRKTHWKSWDCLTK
EKVFGSARRDYSLFVNIYFTFTNMSNTGDNG
IYFTFTNMSNTGDNGNTGYKEKEAPVNTNGG
TEIEKRRKQLAALLENNAESSAIRLATDQLS
EIEKRRKQLAALLENNAESSAIRLATDQLSE
_MGIRVGRSAMDWGINGGLGRRRQRSCLPPP
RHLASGNLQKINQSPNVLNQAMHSERTQDKV
ASGNLQKINQSPNVLNQAMHSERTQDKVEKS
ENHPKTIAASIMPESNRLAGNKRSRSATRWS
EGVNSSRRTFDCPKTNSILSAQSTTGSFNST
SILSAQSTTGSFNSTNSDRLRDRPGAAPSTK
QRSLQSSLRLTDAVTNNGMSSRKGVAPQKCF
RSLQSSLRLTDAVTNNGMSSRKGVAPQKCFS
KLHIGSYANQIRVKMNVSQSMPEKFHWKIEI
NAGDTYWIVSTTKLQNLTQYQAVERVNPTLV
__________MDGRDNLCLVDKIVPLFNFSA
_MASPCRIPAATGSGNKENNISQNRRHVLDC
SPCRIPAATGSGNKENNISQNRRHVLDCQTP
PCRIPAATGSGNKENNISQNRRHVLDCQTPC
PAATGSGNKENNISQNRRHVLDCQTPCEGKG
RMAAGKQKKRIIRSTNSDQNRTWKKSKVESS
GKQKKRIIRSTNSDQNRTWKKSKVESSNCHI
FDRVAMHPKLPQEAKNKDQGLCSSNGPREHQ
LPQEAKNKDQGLCSSNGPREHQNLEH_____
___MKAATGVAADEVNRRASGGGRREAGDRV
TKADLPKKSRKEDLENVAGMGSATASGGKFD
LFGNTAAAAPAADSYNPKNKRGLRIQIERIR
NTAAAAPAADSYNPKNKRGLRIQIERIRFPR
VRSFGGEKRQISMFDNLALAFQNSGTKLGVL	VRSFGGEKRQISMFDNLALAFQNSGTKLGVL
KRQISMFDNLALAFQNSGTKLGVLKSANESL	KRQISMFDNLALAFQNSGTKLGVLKSANESL
TCAADLAPLLGPVAANATDYLCNRFADTTSA	TCAADLAPLLGPVAANATDYLCNRFADTTSA
SAGTGIGLEFRESGLNLNPKNDRIIKAGMVF	SAGTGIGLEFRESGLNLNPKNDRIIKAGMVF
GTGIGLEFRESGLNLNPKNDRIIKAGMVFNV	GTGIGLEFRESGLNLNPKNDRIIKAGMVFNV
GARVAAVKEAKPQGSNKRGATTNSSVANGVE	GARVAAVKEAKPQGSNKRGATTNSSVANGVE
LFRSKRLDSEIFFAPNSNSI___________	LFRSKRLDSEIFFAPNSNSI___________
RSKRLDSEIFFAPNSNSI_____________	RSKRLDSEIFFAPNSNSI_____________
VKSEWKKDENMAGEWNHTSGKWNGDPEDKGI	VKSEWKKDENMAGEWNHTSGKWNGDPEDKGI
_______MSAAAAASNVEFIRSRSDKREYRR	_______MSAAAAASNVEFIRSRSDKREYRR
TFSSEQAMRDAIEGMNGKELDGRNITVNEAQ	TFSSEQAMRDAIEGMNGKELDGRNITVNEAQ
HYKPENVGVKVLDSVNITLGAEDELKNAVGL	HYKPENVGVKVLDSVNITLGAEDELKNAVGL
_____MLTVAASALRNNKKSTAAACFSLAMP	_____MLTVAASALRNNKKSTAAACFSLAMP
____MLTVAASALRNNKKSTAAACFSLAMPF	____MLTVAASALRNNKKSTAAACFSLAMPF
DKLTSEQKAEYEQMMNNLHN___________	DKLTSEQKAEYEQMMNNLHN___________
KLTSEQKAEYEQMMNNLHN____________	KLTSEQKAEYEQMMNNLHN____________
QRNEGCKEEKTKATANDISNPNGKLAILLVD	QRNEGCKEEKTKATANDISNPNGKLAILLVD
GCKEEKTKATANDISNPNGKLAILLVDFRVG	GCKEEKTKATANDISNPNGKLAILLVDFRVG
KEEKTKATANDISNPNGKLAILLVDFRVGNL	KEEKTKATANDISNPNGKLAILLVDFRVGNL
TLKKANAENKALSGDNKSLHADLEAANKRDA	TLKKANAENKALSGDNKSLHADLEAANKRDA
KSIMAAPHNRGGVSGNGGMAMAAVATS____	KSIMAAPHNRGGVSGNGGMAMAAVATS____
LEVVDDDVEKFLSDLNLAMADMKKERDALAK	LEVVDDDVEKFLSDLNLAMADMKKERDALAK
_______MLAGVVMPNKSSSNSSRTSSSSSP	_______MLAGVVMPNKSSSNSSRTSSSSSP
__MLAGVVMPNKSSSNSSRTSSSSSPGGGVA	__MLAGVVMPNKSSSNSSRTSSSSSPGGGVA
YLPNKRIAVGELQHCNLSYNIAVVNVKGFCC	YLPNKRIAVGELQHCNLSYNIAVVNVKGFCC
KRIAVGELQHCNLSYNIAVVNVKGFCCLRTA	KRIAVGELQHCNLSYNIAVVNVKGFCCLRTA
GELQHCNLSYNIAVVNVKGFCCLRTAELDKQ	GELQHCNLSYNIAVVNVKGFCCLRTAELDKQ

## Sheet: proteins
Identified proteins from WT and mld1
proteins of mld1	proteins of WT
	Os03g0775250
	LOC_Os12g10390
	LOC_Os11g36140
	LOC_Os11g35550
	LOC_Os04g54810
	LOC_Os03g40330
	LOC_Os02g01740
	LOC_Os12g40190
	LOC_Os06g09130
	LOC_Os07g36080
	LOC_Os04g58400
	LOC_Os10g21268
	LOC_Os03g20430
	LOC_Os05g34050
	LOC_Os12g41510
	LOC_Os03g20940
	EEC75266.1
	LOC_Os04g27370
	EEE69780.1
	LOC_Os08g12220
	LOC_Os06g40590
	A0A0E0GQ84
	LOC_Os01g48660
	BAC05660.1
LOC_Os08g07760
LOC_Os03g27990
LOC_Os06g36270
LOC_Os12g28050
LOC_Os02g40240
LOC_Os12g12010
LOC_Os02g13510
LOC_Os06g12360
LOC_Os03g32620
LOC_Os02g01010
LOC_Os05g23600
LOC_Os01g27150
LOC_Os08g01180
LOC_Os04g45290
LOC_Os02g33110
LOC_Os03g56620
LOC_Os09g38440
LOC_Os06g22670
LOC_Os02g09420
LOC_Os02g50690
LOC_Os01g58280
LOC_Os04g35140
LOC_Os02g16940
LOC_Os08g30740
LOC_Os03g60820
LOC_Os03g03680
LOC_Os06g36080
LOC_Os01g26270
LOC_Os11g32260
LOC_Os04g59150
LOC_Os04g45600
LOC_Os02g04340
LOC_Os02g37590
LOC_Os09g27210
LOC_Os01g08560
LOC_Os08g25460
LOC_Os01g08680
LOC_Os07g48020
LOC_Os12g42550
LOC_Os03g14800
LOC_Os10g35690
LOC_Os03g30250
LOC_Os07g45064
LOC_Os02g08320
LOC_Os03g20290
LOC_Os12g15590
LOC_Os08g44270
LOC_Os02g02524
LOC_Os03g61130
LOC_Os11g28410
LOC_Os05g25310
LOC_Os01g54050
LOC_Os01g14450
LOC_Os03g36239
LOC_Os03g44590
LOC_Os05g23120
LOC_Os02g54280
LOC_Os04g10740
LOC_Os06g42180
LOC_Os03g08820
LOC_Os03g07750
LOC_Os03g21270
Os11g0201540
LOC_Os03g45180
LOC_Os05g38020
BAD87157.1
LOC_Os12g01220
LOC_Os07g27760
LOC_Os08g39280
LOC_Os01g37530
LOC_Os06g04970
LOC_Os09g33890
LOC_Os07g28090	LOC_Os07g28090
LOC_Os04g43070	LOC_Os04g43070
LOC_Os04g25550	LOC_Os04g25550
LOC_Os01g08820	LOC_Os01g08820
LOC_Os01g74480	LOC_Os01g74480
LOC_Os07g14270	LOC_Os07g14270
LOC_Os01g57073	LOC_Os01g57073
LOC_Os12g43600	LOC_Os12g43600
LOC_Os09g27030	LOC_Os09g27030
LOC_Os10g23120	LOC_Os10g23120
LOC_Os04g19280	LOC_Os04g19280
LOC_Os10g21070	LOC_Os10g21070
LOC_Os05g08040	LOC_Os05g08040
LOC_Os04g33260	LOC_Os04g33260
LOC_Os03g56340	LOC_Os03g56340
Os09g0317500	Os09g0317500
A0A0E0HTG5	A0A0E0HTG5
