# Supplementary material for: The Rice Malectin Regulates Plant Cell Death and Disease Resistance by Participating in Glycoprotein Quality Control
Source: Int J Mol Sci. 2022 May 22;23(10):5819. doi: 10.3390/ijms23105819 (PMC9144812; doi:10.3390/ijms23105819)
Supplement: Supplementary file 1 [file ijms-23-05819-s001.zip › Table S3 Identified peptides length.pdf]

Table S3 Identified peptides length

| peptides in WT               | length<br>(acids) | peptides in <i>mld1</i> | length<br>(acids) |
|------------------------------|-------------------|-------------------------|-------------------|
| DLWINKL                      | 7                 | INVSNPR                 | 7                 |
| AGLTKNR                      | 7                 | NTNITAK                 | 7                 |
| PQGSNKR                      | 7                 | NECMSFR                 | 7                 |
| ESGLNLNPK                    | 9                 | PQGSNKR                 | 7                 |
| MMMINTQCNR                   | 10                | ESGLNLNPK               | 9                 |
| TANNTEPFNR                   | 10                | LNSLNLSSNR              | 10                |
| LDNGNHMVSANK                 | 12                | QDANVSEIKK              | 10                |
| PQHKNAEPMVSR                 | 12                | MNVSQSMPEK              | 10                |
| AEYEQMMNNLHN                 | 12                | QLINLSLENK              | 11                |
| ATANDISNPNGK                 | 12                | IFLFNNATNVR             | 11                |
| ALSFLPNFGNYKR                | 13                | ASMEPLNRMVR             | 11                |
| MLTVAASALRNNK                | 13                | SNETGIAGFGR             | 11                |
| ANAENKALSGDNK                | 13                | TSSAESGNVSR             | 11                |
| FLSDLNLAMADMK                | 13                | IGISAFMNSKR             | 11                |
| LDSEIFFAPNSNSI               | 14                | DGRDNLCLVDK             | 11                |
| DENMAGEWNHTSGK               | 14                | IIRSTNSDQNR             | 11                |
| DAIEGMNGKELDGR               | 14                | LNNNSLSGSIPK            | 12                |
| YLNMGDVNLSMADYR              | 15                | LGMVDMSSNGAR            | 12                |
| ESAQDIINLKPLIEK              | 15                | SLTSLTSLNLSR            | 12                |
| KCGPHEDNFGLEPR               | 15                | FESLVNGGNCNR            | 12                |
| SAAAAASNVEFIRSR              | 15                | YGIQTNSTPVAR            | 12                |
| DFKTFVNVETNPNTNR             | 16                | GNNIAHSNTSCR            | 12                |
| VLDNVNITLGADELK              | 16                | YINKPSGNANTK            | 12                |
| MLDATFNAKLGDFGLAR            | 17                | HEDHYLNKYANK            | 12                |
| MASMKLVADNGATSTTK            | 17                | TIAASIMPESNR            | 12                |
| GGVSGNGGMAMAAVATS            | 17                | LQNLTQYQAVR             | 12                |
| MLAGVVMFNKSSSSNR             | 17                | AEYEQMMNNLHN            | 12                |
| METVSEASMGHGMNYALK           | 18                | ATANDISNPNGK            | 12                |
| NRNNIHDPNFFRCQCSSK           | 18                | GLNISDDDYDSR            | 13                |
| GGLDFTKDDENVNSQPFMR          | 19                | SDQGLIEDAQTNR           | 13                |
| RQISMFDNLALAFQNSGTK          | 19                | VSGEVANLCNALR           | 13                |
| EEKVNDSSKNAENADNPIEK         | 20                | MDNCTNIANVYPK           | 13                |
| QLLDLSLSFHQGGLLMANKK         | 21                | VMIQSTNSSVLVK           | 13                |
| IAVGELQHCNLSYIAVVNVK         | 21                | MLSGLDGLENRR            | 13                |
| GNIPTIFLHSLPNLLENPEFQNR      | 25                | SAMDWGINGGLGR           | 13                |
| ATCAADLAPLLGPVAANATDYLCNR    | 25                | MLTVAASALRNNK           | 13                |
| FSTLVPGATSFQPILTAASFNASLFR   | 27                | ANAENKALSGDNK           | 13                |
| LIQSNIYNYLGILLEGRERFEEAIADR  | 29                | FLSDLNLAMADMK           | 13                |
| PLDGNAETQVSSTSPMHVPVISIVGPGG | 31                | AVLPDSNVTVASQK          | 14                |
| MGK                          |                   |                         |                   |

|                              |    |                           |    |
|------------------------------|----|---------------------------|----|
| SPATSLKQLPCVSLSSSMMEENQSVTHG | 39 | NPDNPPrPNYSRR             | 14 |
| NQQSINVDWNK                  |    |                           |    |
| FLGNISMLSYLNLSFNNFSGEVPDFGVF | 41 | INNTNLEFFPVKNK            | 14 |
| TNITAFLIQGNDK                |    |                           |    |
|                              |    | LTDAVTNNGMSSRK            | 14 |
|                              |    | MKAATGVAADEVNR            | 14 |
|                              |    | LDSEIFFAPNSNSI            | 14 |
|                              |    | DENMAGEWNHTSGK            | 14 |
|                              |    | DAIEGMNGKELDGR            | 14 |
|                              |    | TRPDIDGLNGTQSNR           | 15 |
|                              |    | GENTGDNPNMSILQR           | 15 |
|                              |    | SAAAAASNVEFIRSR           | 15 |
|                              |    | LAPGVQNITTVDEAEK          | 16 |
|                              |    | TIDLEQGTIYNMCTQK          | 16 |
|                              |    | ILLGWANESDSVTYDK          | 16 |
|                              |    | GVCQTGDafNTTNCNR          | 16 |
|                              |    | LHLASISAQPNPWCKK          | 16 |
|                              |    | QLAALLENNAESSAIR          | 16 |
|                              |    | VLDSVNITLGAEDELK          | 16 |
|                              |    | VERYNLDVDECISNPR          | 17 |
|                              |    | MDMALPIVNATAAVLAR         | 17 |
|                              |    | NDLGIENTYPWTIMTDK         | 17 |
|                              |    | GGVSGNGGMAMAAVATS         | 17 |
|                              |    | MLAGVVMPNKSSSNSSR         | 17 |
|                              |    | TSNLTALSEQQLVDCDTK        | 18 |
|                              |    | ALHQGNRTVTEYLHEFDR        | 18 |
|                              |    | EDLENVAGMGsATASGGK        | 18 |
|                              |    | MKSLQTLINNVQVLQEASK       | 19 |
|                              |    | HCNCKNSQCLKLQEAITVR       | 19 |
|                              |    | VTSPAGATRCVDAANDLAR       | 19 |
|                              |    | IPAATGSGNKENNISQNR        | 19 |
|                              |    | LPQEAKNKDQGLCSSNGPR       | 19 |
|                              |    | RQISMFDNLALAFQNSGTK       | 19 |
|                              |    | MRRNTVLNLGVEEGGNHGYR      | 20 |
|                              |    | INQSPNVLNQAMHSERTQDK      | 20 |
|                              |    | YINLTFGCPLLDTVVDDLTIK     | 21 |
|                              |    | MIGHNNDEFDDQsISNTETTK     | 21 |
|                              |    | TNSILSAQSTTGsFNSTNSDR     | 21 |
|                              |    | HLFGNTAAAAPAADSYNPKNK     | 21 |
|                              |    | IAVGELQHcNLSYNIaVVNVK     | 21 |
|                              |    | METDDAPNEAASGTDVNMQEAK    | 22 |
|                              |    | LPDSVCEDLTRISRNFWGAENR    | 23 |
|                              |    | GVAEALNETTCFDNQCEGLVIQ GK | 24 |
|                              |    | ATCAADLAPLLGPVAANATDYLCNR | 25 |

|  |                                |    |
|--|--------------------------------|----|
|  | SIGHINNPVYSSDIHNEVGRFTSVEK     | 26 |
|  | SLGVLNLSHNSLSGTIPTTLNDLPVMSK   | 28 |
|  | IGHESDLFVGNALMDFYAKCNDMDSSLK   | 28 |
|  | RDYSLFVNIYFTFTNMSNTGDNGNTGYK   | 28 |
|  | NRNPPIGSNGDNGGNGDGSGGDGGGRSSK  | 29 |
|  | AAAAAPVENSADKGPHQDSQPPSAAAPAK  | 29 |
|  | AQDQQQQVKEEEEEAAVENLPPPPQEEER  | 30 |
|  | DSTTASEALANTDLPAPSSSLAELIGNFSR | 30 |
|  | RDTVMYKVSVMIEIYNEQIHDLLGNSGLE  | 32 |
|  | NR                             |    |
|  | FVVGSTNASWQTNDHSGAASHDAAAAAPA  | 41 |
|  | AAVLGGGHGVPR                   |    |
