# Supplementary material for: The Rice Malectin Regulates Plant Cell Death and Disease Resistance by Participating in Glycoprotein Quality Control
Source: Int J Mol Sci. 2022 May 22;23(10):5819. doi: 10.3390/ijms23105819 (PMC9144812; doi:10.3390/ijms23105819)
Supplement: Supplementary file 1 [file ijms-23-05819-s001.zip › Table S4 Motif analysis of identified peptides.pdf]

**Table S4 Motif analysis of identified peptides**

| Motif   | Motif Logo                                                                          | Score | Number<br>of<br>peptides | Foreground<br>Matches | Background<br>Matches | Fold<br>Enrichment | <i>p</i> -<br>value |
|---------|-------------------------------------------------------------------------------------|-------|--------------------------|-----------------------|-----------------------|--------------------|---------------------|
| N-X-T   | 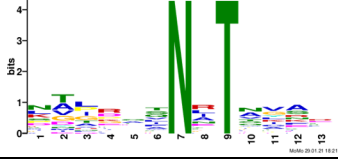   | 3.56  | 23                       | 23/169                | 22359/365844          | 2.2                | 0.00028             |
| N-X-S   | 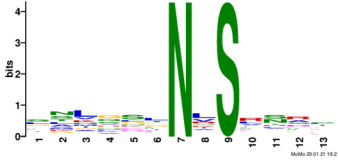   | 4.13  | 30                       | 30/169                | 33618/365844          | 1.9                | 0.00036             |
| N-X-X-N | 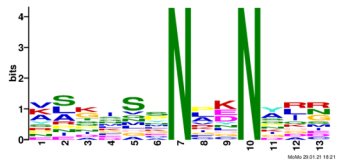 | 2.82  | 18                       | 18/169                | 15909/365844          | 2.4                | 0.00045             |

occurrences = 15, significance = 0.01, background = Ensembl *Oryza sativa*: 43
