# Supplementary material for: The Rice Malectin Regulates Plant Cell Death and Disease Resistance by Participating in Glycoprotein Quality Control
Source: Int J Mol Sci. 2022 May 22;23(10):5819. doi: 10.3390/ijms23105819 (PMC9144812; doi:10.3390/ijms23105819)
Supplement: Supplementary file 1 [file ijms-23-05819-s001.zip › Table S5 COG enrichment of identified N-glycoproteins.xlsx]

## Sheet: mld1
Query_id	KOGID	KOGAnnotation	Cluster	ClusterAnnotation
LOC_Os01g08560.1	KOG0103	Molecular chaperones HSP105/HSP110/SSE1, HSP70 superfamily	O	Posttranslational modification, protein turnover, chaperones
LOC_Os01g08560.1	KOG0104	Molecular chaperones GRP170/SIL1, HSP70 superfamily	O	Posttranslational modification, protein turnover, chaperones
LOC_Os01g08560.1	KOG0101	Molecular chaperones HSP70/HSC70, HSP70 superfamily	O	Posttranslational modification, protein turnover, chaperones
LOC_Os01g08560.1	KOG0100	Molecular chaperones GRP78/BiP/KAR2, HSP70 superfamily	O	Posttranslational modification, protein turnover, chaperones
LOC_Os01g08560.1	KOG0102	Molecular chaperones mortalin/PBP74/GRP75, HSP70 superfamily	O	Posttranslational modification, protein turnover, chaperones
LOC_Os01g08680.1	KOG4468	Polycomb-group transcriptional regulator	K	Transcription
LOC_Os01g08820.1	KOG0955	PHD finger protein BR140/LIN-49	R	General function prediction only
LOC_Os01g08820.1	KOG0954	PHD finger protein	R	General function prediction only
LOC_Os01g08820.1	KOG0956	PHD finger protein AF10	R	General function prediction only
LOC_Os01g08820.1	KOG0958	DNA damage-responsive repressor GIS1/RPH1, jumonji superfamily	L	Replication, recombination and repair
LOC_Os01g08820.1	KOG1080	Histone H3 (Lys4) methyltransferase complex, subunit SET1 and related methyltransferases	BK	Chromatin structure and dynamics;Transcription
LOC_Os01g08820.1	KOG0957	PHD finger protein	R	General function prediction only
LOC_Os01g14450.1	KOG0017	FOG: Transposon-encoded proteins with TYA, reverse transcriptase, integrase domains in various combinations	R	General function prediction only
LOC_Os01g14450.1	LSE3957	C Unnamed protein	X	--
LOC_Os01g26270.1	LSE0034	A Protein kinase, contains EGF domain	T	Signal transduction mechanisms
LOC_Os01g26270.1	KOG1187	Serine/threonine protein kinase	T	Signal transduction mechanisms
LOC_Os01g27150.1	KOG2166	Cullins	D	Cell cycle control, cell division, chromosome partitioning
LOC_Os01g27150.1	KOG2167	Cullins	D	Cell cycle control, cell division, chromosome partitioning
LOC_Os01g27150.1	KOG2284	E3 ubiquitin ligase, Cullin 2 component	O	Posttranslational modification, protein turnover, chaperones
LOC_Os01g27150.1	KOG2285	E3 ubiquitin ligase, Cullin 1 component	O	Posttranslational modification, protein turnover, chaperones
LOC_Os01g27150.1	KOG2165	Anaphase-promoting complex (APC), subunit 2	DO	Cell cycle control, cell division, chromosome partitioning;Posttranslational modification, protein turnover, chaperones
LOC_Os01g54050.1	KOG4747	Two-component phosphorelay intermediate involved in MAP kinase cascade regulation	T	Signal transduction mechanisms
LOC_Os01g57073.1	KOG0959	N-arginine dibasic convertase NRD1 and related Zn2+-dependent endopeptidases, insulinase superfamily	O	Posttranslational modification, protein turnover, chaperones
LOC_Os01g58280.1	LSE0115	A Subtilisin-like proteinase	OR	Posttranslational modification, protein turnover, chaperones;General function prediction only
LOC_Os01g74480.1	LSE0345	A 12S cruciferin seed storage protein/vicilin-like seed storage protein	W	Extracellular structures
LOC_Os02g01010.1	KOG0190	Protein disulfide isomerase (prolyl 4-hydroxylase beta subunit)	O	Posttranslational modification, protein turnover, chaperones
LOC_Os02g01010.1	KOG4277	Uncharacterized conserved protein, contains thioredoxin domain	R	General function prediction only
LOC_Os02g01010.1	KOG0191	Thioredoxin/protein disulfide isomerase	O	Posttranslational modification, protein turnover, chaperones
LOC_Os02g01010.1	KOG0912	Thiol-disulfide isomerase and thioredoxin	OC	Posttranslational modification, protein turnover, chaperones;Energy production and conversion
LOC_Os02g01010.1	KOG1731	FAD-dependent sulfhydryl oxidase/quiescin and related proteins	D	Cell cycle control, cell division, chromosome partitioning
LOC_Os02g04340.1	LSE0422	A Homolog of regulator controlling development of symbiotic root nodules, contains Phox and Bem1p domain, and RWP-RK domain	R	General function prediction only
LOC_Os02g08320.1	KOG0748	Predicted membrane proteins, contain hemolysin III domain	RT	General function prediction only;Signal transduction mechanisms
LOC_Os02g09420.1	LSE1632	A Unnamed protein	X	--
LOC_Os02g13510.1	LSE0002	A Receptor protein kinase containing LRR repeats	T	Signal transduction mechanisms
LOC_Os02g13510.1	KOG0619	FOG: Leucine rich repeat	R	General function prediction only
LOC_Os02g13510.1	KOG1187	Serine/threonine protein kinase	T	Signal transduction mechanisms
LOC_Os02g13510.1	LSE0015	A Receptor-like protein kinase, contains lectin domains	T	Signal transduction mechanisms
LOC_Os02g13510.1	LSE0029	A Receptor-like protein kinase, contains conserved domain of unknown function	T	Signal transduction mechanisms
LOC_Os02g16940.1	LSE0115	A Subtilisin-like proteinase	OR	Posttranslational modification, protein turnover, chaperones;General function prediction only
LOC_Os02g33110.1	KOG0228	Beta-fructofuranosidase (invertase)	G	Carbohydrate transport and metabolism
LOC_Os02g37590.1	KOG2258	Glycerophosphoryl diester phosphodiesterase	C	Energy production and conversion
LOC_Os02g40240.1	LSE0002	A Receptor protein kinase containing LRR repeats	T	Signal transduction mechanisms
LOC_Os02g40240.1	KOG0619	FOG: Leucine rich repeat	R	General function prediction only
LOC_Os02g40240.1	LSE0015	A Receptor-like protein kinase, contains lectin domains	T	Signal transduction mechanisms
LOC_Os02g40240.1	KOG1187	Serine/threonine protein kinase	T	Signal transduction mechanisms
LOC_Os02g40240.1	LSE0029	A Receptor-like protein kinase, contains conserved domain of unknown function	T	Signal transduction mechanisms
LOC_Os02g50690.1	LSE0388	A Predicted lipase	RI	General function prediction only;Lipid transport and metabolism
LOC_Os02g54280.1	KOG0017	FOG: Transposon-encoded proteins with TYA, reverse transcriptase, integrase domains in various combinations	R	General function prediction only
LOC_Os02g54280.1	KOG1124	FOG: TPR repeat	R	General function prediction only
LOC_Os02g54280.1	KOG0619	FOG: Leucine rich repeat	R	General function prediction only
LOC_Os02g54280.1	LSE3957	C Unnamed protein	X	--
LOC_Os03g03680.1	KOG0254	Predicted transporter (major facilitator superfamily)	R	General function prediction only
LOC_Os03g03680.1	KOG0569	Permease of the major facilitator superfamily	G	Carbohydrate transport and metabolism
LOC_Os03g03680.1	KOG0255	Synaptic vesicle transporter SVOP and related transporters (major facilitator superfamily)	R	General function prediction only
LOC_Os03g08820.1	LSE1626	A Unnamed protein	X	--
LOC_Os03g14800.1	KOG1358	Serine palmitoyltransferase	O	Posttranslational modification, protein turnover, chaperones
LOC_Os03g14800.1	KOG1357	Serine palmitoyltransferase	O	Posttranslational modification, protein turnover, chaperones
LOC_Os03g14800.1	KOG1359	Glycine C-acetyltransferase/2-amino-3-ketobutyrate-CoA ligase	E	Amino acid transport and metabolism
LOC_Os03g14800.1	KOG1360	5-aminolevulinate synthase	H	Coenzyme transport and metabolism
LOC_Os03g20290.1	KOG1339	Aspartyl protease	O	Posttranslational modification, protein turnover, chaperones
LOC_Os03g21270.1	LSE0598	A COP1-interacting protein	T	Signal transduction mechanisms
LOC_Os03g27990.1	LSE0002	A Receptor protein kinase containing LRR repeats	T	Signal transduction mechanisms
LOC_Os03g27990.1	KOG1187	Serine/threonine protein kinase	T	Signal transduction mechanisms
LOC_Os03g27990.1	LSE0055	A Protein kinase, contains TNFR domains	T	Signal transduction mechanisms
LOC_Os03g27990.1	LSE0060	A Protein kinase, contains USPA domains	T	Signal transduction mechanisms
LOC_Os03g27990.1	LSE0015	A Receptor-like protein kinase, contains lectin domains	T	Signal transduction mechanisms
LOC_Os03g27990.1	LSE0029	A Receptor-like protein kinase, contains conserved domain of unknown function	T	Signal transduction mechanisms
LOC_Os03g27990.1	LSE0057	A Protein kinase, contains LysM domains	T	Signal transduction mechanisms
LOC_Os03g27990.1	LSE0034	A Protein kinase, contains EGF domain	T	Signal transduction mechanisms
LOC_Os03g30250.1	LSE0392	A Predicted phytochelatin synthetase	H	Coenzyme transport and metabolism
LOC_Os03g32620.1	KOG4197	FOG: PPR repeat	R	General function prediction only
LOC_Os03g36239.1	KOG0017	FOG: Transposon-encoded proteins with TYA, reverse transcriptase, integrase domains in various combinations	R	General function prediction only
LOC_Os03g36239.1	LSE3957	C Unnamed protein	X	--
LOC_Os03g44590.1	TWOG0131	mutator-like transposase	R	General function prediction only
LOC_Os03g45180.1	LSE1664	A Unnamed protein	X	--
LOC_Os03g60820.1	KOG0254	Predicted transporter (major facilitator superfamily)	R	General function prediction only
LOC_Os03g60820.1	KOG0569	Permease of the major facilitator superfamily	G	Carbohydrate transport and metabolism
LOC_Os03g61130.1	LSE1284	A Phospholipase C	T	Signal transduction mechanisms
LOC_Os04g10740.1	KOG1075	FOG: Reverse transcriptase	R	General function prediction only
LOC_Os04g25550.1	KOG1189	Global transcriptional regulator, cell division control protein	E	Amino acid transport and metabolism
LOC_Os04g35140.1	LSE0115	A Subtilisin-like proteinase	OR	Posttranslational modification, protein turnover, chaperones;General function prediction only
LOC_Os04g43070.1	KOG0682	Ammonia permease	P	Inorganic ion transport and metabolism
LOC_Os04g45290.1	KOG0228	Beta-fructofuranosidase (invertase)	G	Carbohydrate transport and metabolism
LOC_Os04g45600.1	LSE1777	A Unnamed protein	X	--
LOC_Os04g59150.1	TWOG0189	Peroxidase	R	General function prediction only
LOC_Os05g23120.1	KOG1075	FOG: Reverse transcriptase	R	General function prediction only
LOC_Os05g23600.1	KOG2291	Oligosaccharyltransferase, alpha subunit (ribophorin I)	O	Posttranslational modification, protein turnover, chaperones
LOC_Os05g25310.1	KOG1180	Acyl-CoA synthetase	I	Lipid transport and metabolism
LOC_Os05g25310.1	KOG1256	Long-chain acyl-CoA synthetases (AMP-forming)	I	Lipid transport and metabolism
LOC_Os05g25310.1	KOG1176	Acyl-CoA synthetase	I	Lipid transport and metabolism
LOC_Os06g04970.1	KOG1765	Regulator of ribosome synthesis	J	Translation, ribosomal structure and biogenesis
LOC_Os06g12360.1	KOG4197	FOG: PPR repeat	R	General function prediction only
LOC_Os06g12360.1	LSE0418	A RWP-RK domain	R	General function prediction only
LOC_Os06g22670.1	KOG1171	Metallothionein-like protein	P	Inorganic ion transport and metabolism
LOC_Os06g36080.1	KOG0239	Kinesin (KAR3 subfamily)	Z	Cytoskeleton
LOC_Os06g36080.1	KOG4280	Kinesin-like protein	Z	Cytoskeleton
LOC_Os06g36080.1	KOG0240	Kinesin (SMY1 subfamily)	Z	Cytoskeleton
LOC_Os06g36080.1	KOG0244	Kinesin-like protein	Z	Cytoskeleton
LOC_Os06g36080.1	KOG0243	Kinesin-like protein	Z	Cytoskeleton
LOC_Os06g36080.1	LSE1327	A Unnamed protein	X	--
LOC_Os06g36080.1	KOG0242	Kinesin-like protein	Z	Cytoskeleton
LOC_Os06g36080.1	KOG0241	Kinesin-like protein	Z	Cytoskeleton
LOC_Os06g36080.1	KOG0245	Kinesin-like protein	Z	Cytoskeleton
LOC_Os06g36080.1	KOG0246	Kinesin-like protein	Z	Cytoskeleton
LOC_Os06g36270.1	LSE0002	A Receptor protein kinase containing LRR repeats	T	Signal transduction mechanisms
LOC_Os06g36270.1	KOG0619	FOG: Leucine rich repeat	R	General function prediction only
LOC_Os06g36270.1	LSE0015	A Receptor-like protein kinase, contains lectin domains	T	Signal transduction mechanisms
LOC_Os06g36270.1	KOG1187	Serine/threonine protein kinase	T	Signal transduction mechanisms
LOC_Os06g36270.1	LSE0029	A Receptor-like protein kinase, contains conserved domain of unknown function	T	Signal transduction mechanisms
LOC_Os06g36270.1	LSE0034	A Protein kinase, contains EGF domain	T	Signal transduction mechanisms
LOC_Os06g36270.1	LSE0057	A Protein kinase, contains LysM domains	T	Signal transduction mechanisms
LOC_Os07g14270.1	KOG0674	Calreticulin	O	Posttranslational modification, protein turnover, chaperones
LOC_Os07g14270.1	KOG0675	Calnexin	O	Posttranslational modification, protein turnover, chaperones
LOC_Os07g27760.1	LSE4127	A Unnamed protein	X	--
LOC_Os07g28090.1	KOG0055	Multidrug/pheromone exporter, ABC superfamily	Q	Secondary metabolites biosynthesis, transport and catabolism
LOC_Os07g28090.1	KOG0058	Peptide exporter, ABC superfamily	U	Intracellular trafficking, secretion, and vesicular transport
LOC_Os07g28090.1	KOG0057	Mitochondrial Fe/S cluster exporter, ABC superfamily	U	Intracellular trafficking, secretion, and vesicular transport
LOC_Os07g28090.1	KOG0056	Heavy metal exporter HMT1, ABC superfamily	P	Inorganic ion transport and metabolism
LOC_Os07g28090.1	KOG0054	Multidrug resistance-associated protein/mitoxantrone resistance protein, ABC superfamily	Q	Secondary metabolites biosynthesis, transport and catabolism
LOC_Os07g28090.1	KOG0061	Transporter, ABC superfamily (Breast cancer resistance protein)	Q	Secondary metabolites biosynthesis, transport and catabolism
LOC_Os07g28090.1	KOG0059	Lipid exporter ABCA1 and related proteins, ABC superfamily	IR	Lipid transport and metabolism;General function prediction only
LOC_Os07g28090.1	KOG0065	Pleiotropic drug resistance proteins (PDR1-15), ABC superfamily	Q	Secondary metabolites biosynthesis, transport and catabolism
LOC_Os07g45064.1	KOG0889	Histone acetyltransferase SAGA, TRRAP/TRA1 component, PI-3 kinase superfamily	TBLD	Signal transduction mechanisms;Chromatin structure and dynamics;Replication, recombination and repair;Cell cycle control, cell division, chromosome partitioning
LOC_Os07g45064.1	KOG0892	Protein kinase ATM/Tel1, involved in telomere length regulation and DNA repair	TBLD	Signal transduction mechanisms;Chromatin structure and dynamics;Replication, recombination and repair;Cell cycle control, cell division, chromosome partitioning
LOC_Os07g45064.1	KOG0890	Protein kinase of the PI-3 kinase family involved in mitotic growth, DNA repair and meiotic recombination	TBLD	Signal transduction mechanisms;Chromatin structure and dynamics;Replication, recombination and repair;Cell cycle control, cell division, chromosome partitioning
LOC_Os07g48020.1	TWOG0189	Peroxidase	R	General function prediction only
LOC_Os08g01180.1	KOG2526	Predicted aminopeptidases - M20/M25/M40 family	E	Amino acid transport and metabolism
LOC_Os08g07760.1	LSE0002	A Receptor protein kinase containing LRR repeats	T	Signal transduction mechanisms
LOC_Os08g07760.1	KOG1187	Serine/threonine protein kinase	T	Signal transduction mechanisms
LOC_Os08g07760.1	LSE0015	A Receptor-like protein kinase, contains lectin domains	T	Signal transduction mechanisms
LOC_Os08g07760.1	KOG0619	FOG: Leucine rich repeat	R	General function prediction only
LOC_Os08g07760.1	LSE0029	A Receptor-like protein kinase, contains conserved domain of unknown function	T	Signal transduction mechanisms
LOC_Os08g25460.1	KOG2593	Transcription initiation factor IIE, alpha subunit	K	Transcription
LOC_Os08g30740.1	KOG0059	Lipid exporter ABCA1 and related proteins, ABC superfamily	IR	Lipid transport and metabolism;General function prediction only
LOC_Os08g30740.1	KOG0061	Transporter, ABC superfamily (Breast cancer resistance protein)	Q	Secondary metabolites biosynthesis, transport and catabolism
LOC_Os08g30740.1	KOG0055	Multidrug/pheromone exporter, ABC superfamily	Q	Secondary metabolites biosynthesis, transport and catabolism
LOC_Os08g30740.1	KOG0056	Heavy metal exporter HMT1, ABC superfamily	P	Inorganic ion transport and metabolism
LOC_Os08g30740.1	KOG0065	Pleiotropic drug resistance proteins (PDR1-15), ABC superfamily	Q	Secondary metabolites biosynthesis, transport and catabolism
LOC_Os08g30740.1	KOG0058	Peptide exporter, ABC superfamily	U	Intracellular trafficking, secretion, and vesicular transport
LOC_Os08g30740.1	KOG0057	Mitochondrial Fe/S cluster exporter, ABC superfamily	U	Intracellular trafficking, secretion, and vesicular transport
LOC_Os08g44270.1	KOG1543	Cysteine proteinase Cathepsin L	O	Posttranslational modification, protein turnover, chaperones
LOC_Os08g44270.1	KOG1542	Cysteine proteinase Cathepsin F	O	Posttranslational modification, protein turnover, chaperones
LOC_Os08g44270.1	KOG1544	Predicted cysteine proteinase TIN-ag	R	General function prediction only
LOC_Os09g27030.2	KOG1543	Cysteine proteinase Cathepsin L	O	Posttranslational modification, protein turnover, chaperones
LOC_Os09g27030.2	KOG1542	Cysteine proteinase Cathepsin F	O	Posttranslational modification, protein turnover, chaperones
LOC_Os09g27030.2	KOG1544	Predicted cysteine proteinase TIN-ag	R	General function prediction only
LOC_Os09g27210.1	KOG2369	Lecithin:cholesterol acyltransferase (LCAT)/Acyl-ceramide synthase	I	Lipid transport and metabolism
LOC_Os09g38440.1	KOG4443	Putative transcription factor HALR/MLL3, involved in embryonic development	R	General function prediction only
LOC_Os09g38440.1	KOG1080	Histone H3 (Lys4) methyltransferase complex, subunit SET1 and related methyltransferases	BK	Chromatin structure and dynamics;Transcription
LOC_Os09g38440.1	KOG1084	Transcription factor TCF20	K	Transcription
LOC_Os09g38440.1	KOG4442	Clathrin coat binding protein/Huntingtin interacting protein HIP1, involved in regulation of endocytosis	U	Intracellular trafficking, secretion, and vesicular transport
LOC_Os09g38440.1	KOG1079	Transcriptional repressor EZH1	K	Transcription
LOC_Os09g38440.1	KOG1081	Transcription factor NSD1 and related SET domain proteins	K	Transcription
LOC_Os09g38440.1	KOG1082	Histone H3 (Lys9) methyltransferase SUV39H1/Clr4, required for transcriptional silencing	BK	Chromatin structure and dynamics;Transcription
LOC_Os09g38440.1	KOG1083	Putative transcription factor ASH1/LIN-59	K	Transcription
LOC_Os09g38440.1	KOG0954	PHD finger protein	R	General function prediction only
LOC_Os10g21070.1	KOG1075	FOG: Reverse transcriptase	R	General function prediction only
LOC_Os10g23120.1	KOG2585	Uncharacterized conserved protein	S	Function unknown
LOC_Os10g23120.1	KOG2586	Pyridoxamine-phosphate oxidase	H	Coenzyme transport and metabolism
LOC_Os10g35690.1	KOG3162	Mitochondrial/chloroplast ribosomal protein S18	J	Translation, ribosomal structure and biogenesis
LOC_Os11g28410.1	KOG0629	Glutamate decarboxylase and related proteins	E	Amino acid transport and metabolism
LOC_Os11g28410.1	KOG0017	FOG: Transposon-encoded proteins with TYA, reverse transcriptase, integrase domains in various combinations	R	General function prediction only
LOC_Os11g28410.1	LSE3957	C Unnamed protein	X	--
LOC_Os11g32260.1	KOG1959	Glycosyl hydrolase, family 38 - alpha-mannosidase	G	Carbohydrate transport and metabolism
LOC_Os11g32260.1	KOG1958	Glycosyl hydrolase, family 38 - alpha-mannosidase	G	Carbohydrate transport and metabolism
LOC_Os12g01220.1	LSE1984	A Unnamed protein	X	--
LOC_Os12g12010.1	KOG0619	FOG: Leucine rich repeat	R	General function prediction only
LOC_Os12g12010.1	LSE0002	A Receptor protein kinase containing LRR repeats	T	Signal transduction mechanisms
LOC_Os12g12010.1	LSE0601	A Pollen extensin-like protein (Pex)	M	Cell wall/membrane/envelope biogenesis
LOC_Os12g12010.1	KOG0472	Leucine-rich repeat protein	S	Function unknown
LOC_Os12g12010.1	KOG4641	FOG: Toll/interleukin receptor and related proteins containing LRR and TIR repeats	T	Signal transduction mechanisms
LOC_Os12g12010.1	LSE0039	A Disease resistance protein (TIR-NBS-LRR class)	VT	Defense mechanisms;Signal transduction mechanisms
LOC_Os12g12010.1	KOG0444	Cytoskeletal regulator Flightless-I (contains leucine-rich and gelsolin repeats)	Z	Cytoskeleton
LOC_Os12g12010.1	LSE0084	A Polygalacturonase inhibiting protein	V	Defense mechanisms
LOC_Os12g15590.1	KOG0722	Molecular chaperone (DnaJ superfamily)	O	Posttranslational modification, protein turnover, chaperones
LOC_Os12g15590.1	KOG0691	Molecular chaperone (DnaJ superfamily)	O	Posttranslational modification, protein turnover, chaperones
LOC_Os12g15590.1	KOG0713	Molecular chaperone (DnaJ superfamily)	O	Posttranslational modification, protein turnover, chaperones
LOC_Os12g15590.1	KOG0714	Molecular chaperone (DnaJ superfamily)	O	Posttranslational modification, protein turnover, chaperones
LOC_Os12g15590.1	KOG0715	Molecular chaperone (DnaJ superfamily)	O	Posttranslational modification, protein turnover, chaperones
LOC_Os12g15590.1	KOG0712	Molecular chaperone (DnaJ superfamily)	O	Posttranslational modification, protein turnover, chaperones
LOC_Os12g15590.1	KOG0724	Zuotin and related molecular chaperones (DnaJ superfamily), contains DNA-binding domains	O	Posttranslational modification, protein turnover, chaperones
LOC_Os12g15590.1	KOG0721	Molecular chaperone (DnaJ superfamily)	O	Posttranslational modification, protein turnover, chaperones
LOC_Os12g42550.1	LSE2191	A Unnamed protein	X	--
LOC_Os12g43600.1	KOG0118	FOG: RRM domain	R	General function prediction only
LOC_Os12g43600.1	LSE3565	H RNA binding motif protein probably involved in spermatogenesis, and related proteins	A	RNA processing and modification
LOC_Os12g43600.1	KOG0899	Mitochondrial/chloroplast ribosomal protein S19	J	Translation, ribosomal structure and biogenesis
LOC_Os12g43600.1	KOG4205	RNA-binding protein musashi/mRNA cleavage and polyadenylation factor I complex, subunit HRP1	A	RNA processing and modification
LOC_Os12g43600.1	LSE1684	A Unnamed protein	X	--
LOC_Os12g43600.1	KOG0149	Predicted RNA-binding protein SEB4 (RRM superfamily)	R	General function prediction only
LOC_Os12g43600.1	KOG0111	Cyclophilin-type peptidyl-prolyl cis-trans isomerase	O	Posttranslational modification, protein turnover, chaperones
LOC_Os12g43600.1	KOG0131	Splicing factor 3b, subunit 4	A	RNA processing and modification

## Sheet: wt
Query_id	KOGID	KOGAnnotation	Cluster	ClusterAnnotation
EEE69780.1	KOG1838	Alpha/beta hydrolase	R	General function prediction only
LOC_Os01g08820.1	KOG0955	PHD finger protein BR140/LIN-49	R	General function prediction only
LOC_Os01g08820.1	KOG0954	PHD finger protein	R	General function prediction only
LOC_Os01g08820.1	KOG0956	PHD finger protein AF10	R	General function prediction only
LOC_Os01g08820.1	KOG0958	DNA damage-responsive repressor GIS1/RPH1, jumonji superfamily	L	Replication, recombination and repair
LOC_Os01g08820.1	KOG1080	Histone H3 (Lys4) methyltransferase complex, subunit SET1 and related methyltransferases	BK	Chromatin structure and dynamics;Transcription
LOC_Os01g08820.1	KOG0957	PHD finger protein	R	General function prediction only
LOC_Os01g48660.1	LSE4125	A Unnamed protein	X	--
LOC_Os01g57073.1	KOG0959	N-arginine dibasic convertase NRD1 and related Zn2+-dependent endopeptidases, insulinase superfamily	O	Posttranslational modification, protein turnover, chaperones
LOC_Os01g74480.1	LSE0345	A 12S cruciferin seed storage protein/vicilin-like seed storage protein	W	Extracellular structures
LOC_Os02g01740.1	KOG0952	DNA/RNA helicase MER3/SLH1, DEAD-box superfamily	A	RNA processing and modification
LOC_Os02g01740.1	KOG0951	RNA helicase BRR2, DEAD-box superfamily	A	RNA processing and modification
LOC_Os02g01740.1	KOG0950	DNA polymerase theta/eta, DEAD-box superfamily	R	General function prediction only
LOC_Os02g01740.1	KOG0948	Nuclear exosomal RNA helicase MTR4, DEAD-box superfamily	A	RNA processing and modification
LOC_Os02g01740.1	KOG0947	Cytoplasmic exosomal RNA helicase SKI2, DEAD-box superfamily	A	RNA processing and modification
LOC_Os02g01740.1	KOG0949	Predicted helicase, DEAD-box superfamily	R	General function prediction only
LOC_Os02g01740.1	KOG4434	Molecular chaperone SEC63, endoplasmic reticulum translocon component	UO	Intracellular trafficking, secretion, and vesicular transport;Posttranslational modification, protein turnover, chaperones
LOC_Os03g20430.1	TWOG0108	CCAAT binding protein	K	Transcription
LOC_Os03g20430.1	KOG1082	Histone H3 (Lys9) methyltransferase SUV39H1/Clr4, required for transcriptional silencing	BK	Chromatin structure and dynamics;Transcription
LOC_Os03g20430.1	KOG1141	Predicted histone methyl transferase	B	Chromatin structure and dynamics
LOC_Os03g40330.1	LSE0111	A beta-1, 3 glucanase	MVG	Cell wall/membrane/envelope biogenesis;Defense mechanisms;Carbohydrate transport and metabolism
LOC_Os04g25550.1	KOG1189	Global transcriptional regulator, cell division control protein	E	Amino acid transport and metabolism
LOC_Os04g43070.1	KOG0682	Ammonia permease	P	Inorganic ion transport and metabolism
LOC_Os04g54810.1	TWOG0186	Predicted beta-D-xylosidase	GR	Carbohydrate transport and metabolism;General function prediction only
LOC_Os04g54810.1	LSE0437	A Predicted beta-glucosidase	GRV	Carbohydrate transport and metabolism;General function prediction only;Defense mechanisms
LOC_Os04g58400.1	KOG2144	Tyrosyl-tRNA synthetase, cytoplasmic	J	Translation, ribosomal structure and biogenesis
LOC_Os05g34050.1	LSE1633	A Unnamed protein	X	--
LOC_Os06g09130.1	KOG1052	Glutamate-gated kainate-type ion channel receptor subunit GluR5 and related subunits	PET	Inorganic ion transport and metabolism;Amino acid transport and metabolism;Signal transduction mechanisms
LOC_Os06g09130.1	KOG1054	Glutamate-gated AMPA-type ion channel receptor subunit GluR2 and related subunits	PET	Inorganic ion transport and metabolism;Amino acid transport and metabolism;Signal transduction mechanisms
LOC_Os06g09130.1	KOG4440	NMDA selective glutamate-gated ion channel receptor subunit GRIN1	PET	Inorganic ion transport and metabolism;Amino acid transport and metabolism;Signal transduction mechanisms
LOC_Os06g09130.1	KOG1053	Glutamate-gated NMDA-type ion channel receptor subunit GRIN2A and related subunits	PET	Inorganic ion transport and metabolism;Amino acid transport and metabolism;Signal transduction mechanisms
LOC_Os07g14270.1	KOG0674	Calreticulin	O	Posttranslational modification, protein turnover, chaperones
LOC_Os07g14270.1	KOG0675	Calnexin	O	Posttranslational modification, protein turnover, chaperones
LOC_Os07g28090.1	KOG0055	Multidrug/pheromone exporter, ABC superfamily	Q	Secondary metabolites biosynthesis, transport and catabolism
LOC_Os07g28090.1	KOG0058	Peptide exporter, ABC superfamily	U	Intracellular trafficking, secretion, and vesicular transport
LOC_Os07g28090.1	KOG0057	Mitochondrial Fe/S cluster exporter, ABC superfamily	U	Intracellular trafficking, secretion, and vesicular transport
LOC_Os07g28090.1	KOG0056	Heavy metal exporter HMT1, ABC superfamily	P	Inorganic ion transport and metabolism
LOC_Os07g28090.1	KOG0054	Multidrug resistance-associated protein/mitoxantrone resistance protein, ABC superfamily	Q	Secondary metabolites biosynthesis, transport and catabolism
LOC_Os07g28090.1	KOG0061	Transporter, ABC superfamily (Breast cancer resistance protein)	Q	Secondary metabolites biosynthesis, transport and catabolism
LOC_Os07g28090.1	KOG0059	Lipid exporter ABCA1 and related proteins, ABC superfamily	IR	Lipid transport and metabolism;General function prediction only
LOC_Os07g28090.1	KOG0065	Pleiotropic drug resistance proteins (PDR1-15), ABC superfamily	Q	Secondary metabolites biosynthesis, transport and catabolism
LOC_Os07g36080.1	LSE1462	A Unnamed protein	X	--
LOC_Os09g27030.2	KOG1543	Cysteine proteinase Cathepsin L	O	Posttranslational modification, protein turnover, chaperones
LOC_Os09g27030.2	KOG1542	Cysteine proteinase Cathepsin F	O	Posttranslational modification, protein turnover, chaperones
LOC_Os09g27030.2	KOG1544	Predicted cysteine proteinase TIN-ag	R	General function prediction only
LOC_Os10g21070.1	KOG1075	FOG: Reverse transcriptase	R	General function prediction only
LOC_Os10g21268.1	LSE2181	A Ribulose 1,5-bisphosphate carboxylase, large subunit	C	Energy production and conversion
LOC_Os10g23120.1	KOG2585	Uncharacterized conserved protein	S	Function unknown
LOC_Os10g23120.1	KOG2586	Pyridoxamine-phosphate oxidase	H	Coenzyme transport and metabolism
LOC_Os11g35550.1	KOG0619	FOG: Leucine rich repeat	R	General function prediction only
LOC_Os11g35550.1	LSE0002	A Receptor protein kinase containing LRR repeats	T	Signal transduction mechanisms
LOC_Os11g36140.1	LSE0002	A Receptor protein kinase containing LRR repeats	T	Signal transduction mechanisms
LOC_Os11g36140.1	KOG0619	FOG: Leucine rich repeat	R	General function prediction only
LOC_Os11g36140.1	LSE0015	A Receptor-like protein kinase, contains lectin domains	T	Signal transduction mechanisms
LOC_Os11g36140.1	KOG1187	Serine/threonine protein kinase	T	Signal transduction mechanisms
LOC_Os12g10390.1	KOG4658	Apoptotic ATPase	T	Signal transduction mechanisms
LOC_Os12g40190.1	KOG0082	G-protein alpha subunit (small G protein superfamily)	DT	Cell cycle control, cell division, chromosome partitioning;Signal transduction mechanisms
LOC_Os12g40190.1	KOG0099	G protein subunit Galphas, small G protein superfamily	T	Signal transduction mechanisms
LOC_Os12g40190.1	KOG0085	G protein subunit Galphaq/Galphay, small G protein superfamily	T	Signal transduction mechanisms
LOC_Os12g41510.1	LSE0015	A Receptor-like protein kinase, contains lectin domains	T	Signal transduction mechanisms
LOC_Os12g41510.1	LSE0029	A Receptor-like protein kinase, contains conserved domain of unknown function	T	Signal transduction mechanisms
LOC_Os12g41510.1	KOG1187	Serine/threonine protein kinase	T	Signal transduction mechanisms
LOC_Os12g41510.1	LSE0002	A Receptor protein kinase containing LRR repeats	T	Signal transduction mechanisms
LOC_Os12g43600.1	KOG0118	FOG: RRM domain	R	General function prediction only
LOC_Os12g43600.1	LSE3565	H RNA binding motif protein probably involved in spermatogenesis, and related proteins	A	RNA processing and modification
LOC_Os12g43600.1	KOG0899	Mitochondrial/chloroplast ribosomal protein S19	J	Translation, ribosomal structure and biogenesis
LOC_Os12g43600.1	KOG4205	RNA-binding protein musashi/mRNA cleavage and polyadenylation factor I complex, subunit HRP1	A	RNA processing and modification
LOC_Os12g43600.1	LSE1684	A Unnamed protein	X	--
LOC_Os12g43600.1	KOG0149	Predicted RNA-binding protein SEB4 (RRM superfamily)	R	General function prediction only
LOC_Os12g43600.1	KOG0111	Cyclophilin-type peptidyl-prolyl cis-trans isomerase	O	Posttranslational modification, protein turnover, chaperones
LOC_Os12g43600.1	KOG0131	Splicing factor 3b, subunit 4	A	RNA processing and modification

## Sheet: stat
The GOGs of the WT and mld1 mutant N-glycosylation proteomes
Cluster	ClusterAnnotation	mld1	WT	Annotation
W	Extracellular structures	1	1	cellular processes and signaling
V	Defense mechanisms	1	2	cellular processes and signaling
M	Cell wall/membrane/envelope biogenesis	1	1	cellular processes and signaling
A	RNA processing and modification	1	2	information storage and processing
Z	Cytoskeleton	2	0	cellular processes and signaling
S	Function unknown	2	1	poorly characterized
Q	Secondary metabolites biosynthesis, transport and catabolism	2	1	metabolism
L	Replication, recombination and repair	2	1	information storage and processing
C	Energy production and conversion	2	1	metabolism
U	Intracellular trafficking, secretion, and vesicular transport	3	2	cellular processes and signaling
J	Translation, ribosomal structure and biogenesis	3	2	information storage and processing
H	Coenzyme transport and metabolism	3	1	metabolism
D	Cell cycle control, cell division, chromosome partitioning	3	1	cellular processes and signaling
B	Chromatin structure and dynamics	3	2	information storage and processing
P	Inorganic ion transport and metabolism	4	3	metabolism
K	Transcription	4	2	information storage and processing
E	Amino acid transport and metabolism	4	2	metabolism
I	Lipid transport and metabolism	5	1	metabolism
G	Carbohydrate transport and metabolism	5	2	metabolism
T	Signal transduction mechanisms	12	6	cellular processes and signaling
O	Posttranslational modification, protein turnover, chaperones	15	5	cellular processes and signaling
R	General function prediction only	33	10	poorly characterized
X	other	13	4	other
