# Supplementary material for: The Rice Malectin Regulates Plant Cell Death and Disease Resistance by Participating in Glycoprotein Quality Control
Source: Int J Mol Sci. 2022 May 22;23(10):5819. doi: 10.3390/ijms23105819 (PMC9144812; doi:10.3390/ijms23105819)
Supplement: Supplementary file 1 [file ijms-23-05819-s001.zip › Table S6 subcellular location of N-glycoproteins.pdf]

**Table S6 subcellular location of *N*-glycoproteins**

| Subcelluar            | number      |    |        | percentage  |       |        |
|-----------------------|-------------|----|--------|-------------|-------|--------|
|                       | <i>mld1</i> | WT | shared | <i>mld1</i> | WT    | shared |
| chloroplast           | 28          | 4  | 7      | 38.89       | 16.67 | 41.18  |
| nuclear               | 15          | 6  | 7      | 20.83       | 25    | 41.18  |
| plasma membrane       | 10          | 4  | 1      | 13.89       | 16.67 | 5.88   |
| cytoplasmic           | 9           | 8  | 1      | 12.5        | 33.33 | 5.88   |
| extracellular         | 6           | 1  | 0      | 8.33        | 4.17  | 0      |
| endoplasmic reticulum | 2           | 0  | 0      | 2.78        | 0     | 0      |
| Golgi body            | 1           | 0  | 0      | 1.39        | 0     | 0      |
| vacuolar              | 1           | 1  | 1      | 1.39        | 4.17  | 5.88   |
| All                   | 72          | 24 | 17     | 100         | 100   | 100    |
