# Supplementary material for: The Rice Malectin Regulates Plant Cell Death and Disease Resistance by Participating in Glycoprotein Quality Control
Source: Int J Mol Sci. 2022 May 22;23(10):5819. doi: 10.3390/ijms23105819 (PMC9144812; doi:10.3390/ijms23105819)
Supplement: Supplementary file 1 [file ijms-23-05819-s001.zip › Table S7 primers used in this study.pdf]

**Table S1 primers used in this study**

| Primer name        | Forward primer (5'-3')     | Reverse primer (5'-3')      | Enzyme site | Use of primers                          |
|--------------------|----------------------------|-----------------------------|-------------|-----------------------------------------|
| L13-1              | GATATGCCCACCCTTTACTCA      |                             |             | Identification for T-DNA insertion site |
| L13-2              | ATGTCAATGGTCAGCTAGCAGT     |                             |             | Identification for T-DNA insertion site |
| L3                 | GATGCCGACCGGATCTGTGATC     |                             |             | Identification for T-DNA insertion site |
| R3                 | CTGTTGCCGGTCTTGCGATGAT     |                             |             | Identification for T-DNA insertion site |
| G1(LOC_Os03g03290) | TCTTCTCCTGCCGCGCGTCCTA     | TGAGACGACA ATCCATTGGT       |             | RT-PCR                                  |
| G2(LOC_Os03g03300) | ATGGAGGGAGCTAGCAATGGA      | TTAGTATGTC CGAATGTC         |             | RT-PCR                                  |
| ACTIN              | TGGAAGTGGTATGGTCAAGGC      | AGTCTCATG GATACCCGCAG       |             | RT-PCR                                  |
| G1(LOC_Os03g03290) | GTGGATGTTGAGGATGAAGGGGCC   | TCTTAGCGGACACAAGTTGATATGCTC |             | qRT-PCR                                 |
| G2(LOC_Os03g03300) | GCTAGCAATGGAGCATTTCTTCCCTG | TTAGTATGTCCGAATGTCGTTACTGCG |             | qRT-PCR                                 |

|                         |                        |                           |                                                     |
|-------------------------|------------------------|---------------------------|-----------------------------------------------------|
| OsRAc1( LOC_Os03g50885) | ATCACTGCCTTGGCTCCTA    | CATCTGCTGGAATGTGCTG       | qRT-PCR                                             |
| OsPR1a(LOC_Os01g28450)  | CGTCGGACAGAGGCCTTACT   | GACCGTGAAGGCGTGGAT        | qRT-PCR                                             |
| OsPR1b(LOC_Os07g03710)  | GGCAACTTCGTCGGACAGA    | CCGTGGACCTGTTTACATTTTCA   | qRT-PCR                                             |
| OsPR3(LOC_Os10g39680)   | CCTATTGCATGATCGTTCGAT  | GCCTGTAGCAGTTAAAGCAATTG   | qRT-PCR                                             |
| OsPR5(LOC_Os12g43380)   | CCACGTGTGCAATTGTTTAATC | ACTCGGACGCTTTCATTTGA      | qRT-PCR                                             |
| OsPR8(LOC_Os10g28080)   | TTCATCTGGTCAGCGGATAGC  | TATCACGACCGTTTCGATGGA     | qRT-PCR                                             |
| OsPR10 (LOC_Os12g36880) | CCTGCCGAATACGCCTAAGA   | CTCAAACGCCACGAGAATTT      | qRT-PCR                                             |
| WRKY45(LOC_Os05g25770)  | AGCAATCGTCCGGGAATTC    | GAAGTAGGCCTTTGGGTGCTT     | qRT-PCR                                             |
| WRKY62(LOC_Os09g25070)  | TGAAGGATGGGTACCAATGGA  | CACATCTTTGGAGCTTCTTCTGA   | qRT-PCR                                             |
| NOL(LOC_Os03g45194)     | CCACGAAAGGTATAGGATATG  | TCAAGTCAGTCACCGCAGAT      | qRT-PCR                                             |
| RCCR1(LOC_Os10g25030)   | CGCATTTCCTCATGGAATTT   | CTTCTCACGCTGTTTGTCCA      | qRT-PCR                                             |
| Osh36(LOC_Os05g39770)   | GCACGGAGGCGAACGA       | TTGAGCGGTAGCACCCATT       | qRT-PCR                                             |
| Osl57(LOC_Os02g57260)   | ACCCTAAAGTAAATGAAGTC   | CCTGCTCTTGTCTTGTTA        | qRT-PCR                                             |
| Osl85(LOC_Os07g34520)   | GAGCAACGGCGTGGAGA      | GCGGCGGTAGAGGAGATG        | qRT-PCR                                             |
| 3Flag+OsMLD1            | TACTGCAGCACCAATCCGCCAT | ATACTAGTAGGTCAACAGCCACAGT | Pst I /<br>Spe I<br>pMLD1-OE vector<br>construction |

|                          |                                  |                                  |                |                                            |
|--------------------------|----------------------------------|----------------------------------|----------------|--------------------------------------------|
| CRISPR-OsMLD1            | <u>ggca</u> GGCACCTACCCTCCCGTCCG | <u>aaac</u> CGGACGGGAGGGTAGGTGCC | Bsa I          | MLD1-KN vector construction                |
| OsMLD1-GFP               | ATAGGATCCATGGCTAGTGTTCTCG        | ATAGTCGACATAGTCTGTCTTAGCGGAC     | Bam HI / Sal I | p35S:GFP-MLD1 for subcellular localization |
| Hyr                      | GCTGCGCCGATGGTTTCTACAA           | CACGGCCTCCAGAAGAAGATGTTG         |                | Transgenic plant test                      |
| MLD1-KN -JD              | CCACACCAATCCGCCATG               | CGAAGGTGAGGACGAGGAC              |                | Identification for KN site                 |
| OsZIP60(LOC_Os07g44950)  | TGGTTATTAAGTCCATTGTTGCGAGTG      | AGTCTCCTCCTTTCCTTGTTTCC          |                | qRT-PCR                                    |
| OsZIP39(LOC_Os05g34050)  | CCAAGGGAGGCTGGTAATG              | AAAGGAAGCGTGCAGGAGTA             |                | qRT-PCR                                    |
| OsZIP28(LOC_Os03g20310)  | TATCACAGGGAATGGAAGC              | GATGTAAAGTCTGCTGCCG              |                | qRT-PCR                                    |
| OsZIP50(LOC_Os06g41770)  | CGCCAGAGCTTGTTGAAGGATAGG         | GCGGCAGGGTTTCCGTGAGTA            |                | qRT-PCR                                    |
| OsCNX(LOC_Os04g32950)    | GAAGGACGACTACAAAGGTG             | ACTCAAGGCCATTCTGAAG              |                | qRT-PCR                                    |
| OsCRT1(LOC_Os07g14270)   | AATGGAAGGCACCGATGA               | GTCTCCTCTGCGAATGTCT              |                | qRT-PCR                                    |
| OsCRT2(LOC_Os03g61670)   | GAGGATGAGGCGGACGATGA             | CCTTGATGTCCTGCGGTTTC             |                | qRT-PCR                                    |
| OsIRE1(LOC_Os07g28820)   | TGCCCTGCTTGCAGACATGG             | GACCCAAGTAGCTCCTTGAGATC          |                | qRT-PCR                                    |
| NEF(LOC_Os09g33780)      | ATTAAAGATGCCGTCAGATGCT           | GTCAATGGGCTCAACGAGAAT            |                | qRT-PCR                                    |
| OsERdj3B(LOC_Os05g06440) | AACTGTTACAATCTCCCTGCTC           | GGTGCCAATTTCCACCATA              |                | qRT-PCR                                    |

|                        |                                                          |                                                               |                  |            |
|------------------------|----------------------------------------------------------|---------------------------------------------------------------|------------------|------------|
| OsVPE2(LOC_Os08g06010) | CGGCTCCAACGGCTACTACAAC                                   | TCGGGACCCCAGCATAGACA                                          |                  | qRT-PCR    |
| OsVPE3(LOC_Os02g43010) | CGGTAACTACAGGCACCAGGC                                    | GTGACTTCGTCTCCAGTGTAATCC                                      |                  | qRT-PCR    |
| OsbZIP50 splice        | CCAGAGCTTGTTGAAGGATAG                                    | GGTTTCGGTTGGGTAGAC                                            |                  | RT-PCR     |
| NYFP-Rpn1              | ATTAACAAGGCCATTACGGCCATGGCG<br>ACGCCACCGCCG              | AACTGATTGGCCGAGGCGGCCCGG<br>ATCTCACTGATGTACTCT                | Sif I            | BiFC assay |
| CYFP-MLD1              | ATTAACAAGGCCATTACGGCCATGGCT<br>AGTGTTCTCGCCGTC           | AACTGATTGGCCGAGGCGGCCCGT<br>CAATAGTCTGTCTTAGC                 | Sif I            | BiFC assay |
| MLD1F-CLUC             | ACGGGGGACGAGCTC <u>GGTACC</u> ATGGCT<br>AGTGTTCTC        | CGCGTACGAGATCT <u>GGTCGAC</u> ATAG<br>TCTGTCTTAGCGG           | Kpn I /<br>Sal I | LCI assay  |
| Rpn1F-NLUC             | ACGGGGGACGAGCTC <u>GGTACC</u> ATGGC<br>GACGCCACCGCCGCT   | AACATCGTATGGGTAG <u>TCGAC</u> GATC<br>TCACTGATGTACTCT         | Kpn I /<br>Sal I | LCI assay  |
| MLD1N-CLUC             | ACGGGGGACGAGCTC <u>GGTACC</u> ATGGCT<br>AGTGTTCTC        | CGCGTACGAGATCT <u>GGTCGAC</u> TTTGT<br>TCATCCTCATTATCTCTACAGC | Kpn I /<br>Sal I | LCI assay  |
| MLD1C-CLUC             | ACGGGGGACGAGCTC <u>GGTACC</u> ACAAA<br>TGGTGGTATTGATGGGG | CGCGTACGAGATCT <u>GGTCGAC</u> ATAG<br>TCTGTCTTAGCGGACAC       | Kpn I /<br>Sal I | LCI assay  |
| Rpn1N-NLUC             | ACGGGGGACGAGCTC <u>GGTACC</u> ATGGC<br>GACGCCACCGCCGCT   | AACATCGTATGGGTAG <u>TCGAC</u> ATTAT<br>GCTCT GGAATAACAT       | Kpn I /<br>Sal I | LCI assay  |
| Rpn1C-NLUC             | ACGGGGGACGAGCTC <u>GGTACC</u> CTATAT<br>TTCC AGGTTTACTA  | AACATCGTATGGGTAG <u>TCGAC</u> GATC<br>TCACTGATGTACTCT         | Kpn I /<br>Sal I | LCI assay  |

|            |                                                  |                                                |                   |                                               |
|------------|--------------------------------------------------|------------------------------------------------|-------------------|-----------------------------------------------|
| Rpn1-GFP   | ATAGGATCCATGGCGACGCCACCGC                        | ATAGTCGACGATCTCACTGATGTAC                      | Bam HI<br>/ Sal I | Co-IP assay in<br><i>N.benthamiana</i>        |
| MLD1-FLAG  | TCTGATCAAGAGACAGGATCCATGGCT<br>AGTGTTCTC         | GTAGTCAGCGGCCGCTCTAGAATAG<br>TCTGTCTTAGCGGACAC | Bam HI<br>/ Xba I | Co-IP assay in<br><i>N.benthamiana</i>        |
| MLD1-HA    | CGGGGGACGAGCTCGGTACCATGGCTA<br>GTGTTCTC          | ACATCGTATGGGTAGTCGACATAGT<br>CTGTCTTAGCGGAC    | Kpn I<br>/Bgst II | Co-IP assay in rice<br>protoplasts            |
| Rpn1-FLAG  | CGGGGGACGAGCTCGGTACCATGGCG<br>ACGCCACCGCCG       | TGGTCTTTGTAGTCTTCGAAGATCTC<br>ACTGATGTACTCT    | Kpn I<br>/Bgst II | Co-IP assay in rice<br>protoplasts            |
| SERK1-NLUC | ACGGGGGACGAGCTCGGTACCATGGC<br>GGCGCATCGGTGGGCGGT | AACATCGTATGGGTAGTCGACCCTC<br>GGCCCTGATAGCTC    | Kpn I /<br>Sal I  | LCI assay                                     |
| SERK2-NLUC | ACGGGGGACGAGCTCGGTACCATGGC<br>GGAGG CGCGGCTGC    | AACATCGTATGGGTAGTCGACCCTC<br>GGGCCGGACAGCTC    | Kpn I /<br>Sal I  | LCI assay                                     |
| 35S-SERK1  | ATACACCAAATCGACTCTAGAATGGCG<br>GCGCATCGG         | GGGAAATTCGAGCTCGGTACCTCAC<br>CTCGGCCCTGATAG    | Xba I /<br>KpnI   | cell death                                    |
| 35S-SERK2  | ATACACCAAATCGACTCTAGAATGGCG<br>GAGG CGCGGCTGC    | GGGAAATTCGAGCTCGGTACCCCTC<br>GGGCCGGACAGCTC    | Xba I /<br>Kpn I  | cell death                                    |
| SERK1-FLAG | TCTGATCAAGAGACAGGATCCATGGCG<br>GCGCATCGGTGGGCGGT | GTAGTCAGCGGCCGCTCTAGACCTC<br>GGCCCTGATAGCTC    | Bam HI<br>/ Xba I | <i>N</i> -glycosylation<br>modification assay |

|            |                                               |                                             |                   |                                               |
|------------|-----------------------------------------------|---------------------------------------------|-------------------|-----------------------------------------------|
| SERK2-FLAG | TCTGATCAAGAGACAGGATCCATGGCG<br>GAGG CGCGGCTGC | GTAGTCAGCGGCCGCTCTAGACCTC<br>GGGCCGGACAGCTC | Bam HI<br>/ Xba I | <i>N</i> -glycosylation<br>modification assay |
| SERK1-GFP  | GGGGTACCATGGCGGCGCATCGGTGGG<br>CGGT           | GCTCTAGACCTCGGCCCTGATAG<br>CTC              | KpnI /<br>Xba I   |                                               |
| SERK2-GFP  | GGGGTACCATGGCGGAGG<br>CGCGGCTGC               | GCTCTAGACCTCGGGCCGGACAG<br>CTC              | KpnI /<br>Xba I   |                                               |

---
